# Supplementary material for: Bioactive Capnosanes and Cembranes from the Soft Coral Klyxum flaccidum
Source: MDPI journal article supplement (doi:10.3390/md17080461), 2019-08-07
Supplement: s1 [file s1]

# Bioactive Capnosanes and Cembranes from the Soft Coral

## Klyxum Flaccidum

Wan-Ru Tseng, Atallah F. Ahmed, Chiung-Yao Huang, Yi-Ying Tsai, Chi-Jen Tai, Raha S. Orfali, Tsong-Long Hwang, Yi-Hsuan Wang, Chang-Feng Dai and Jyh-Horng Sheu \*

### List of Supplementary material

| No.        | Content                                                                                   | Page |
|------------|-------------------------------------------------------------------------------------------|------|
| Figure S1  | HRESIMS spectrum of <b>1</b>                                                              | S2   |
| Figure S2  | <sup>1</sup> H NMR spectrum of <b>1</b> in C <sub>6</sub> D <sub>6</sub> at 500 MHz       | S3   |
| Figure S3  | <sup>13</sup> C NMR spectrum of <b>1</b> in C <sub>6</sub> D <sub>6</sub> at 125 MHz      | S4   |
| Figure S4  | <sup>1</sup> H- <sup>1</sup> H COSY spectrum of <b>1</b> in C <sub>6</sub> D <sub>6</sub> | S5   |
| Figure S5  | HSQC spectrum of <b>1</b> in C <sub>6</sub> D <sub>6</sub>                                | S6   |
| Figure S6  | HMBC spectrum of <b>1</b> in C <sub>6</sub> D <sub>6</sub>                                | S7   |
| Figure S7  | NOESY spectrum of <b>1</b> in C <sub>6</sub> D <sub>6</sub>                               | S8   |
| Figure S8  | HRESIMS spectrum of <b>2</b>                                                              | S9   |
| Figure S9  | <sup>1</sup> H NMR spectrum of <b>2</b> in CDCl <sub>3</sub> at 400 MHz                   | S10  |
| Figure S10 | <sup>13</sup> C NMR spectrum of <b>2</b> in CDCl <sub>3</sub> at 100 MHz                  | S11  |
| Figure S12 | HSQC spectrum of <b>2</b> in CDCl <sub>3</sub>                                            | S12  |
| Figure S13 | HMBC spectrum of <b>2</b> in CDCl <sub>3</sub>                                            | S13  |
| Figure S14 | NOESY spectrum of <b>2</b> in CDCl <sub>3</sub>                                           | S14  |
| Figure S15 | HRESIMS spectrum of <b>3</b>                                                              | S15  |
| Figure S16 | <sup>1</sup> H NMR spectrum of <b>3</b> in CDCl <sub>3</sub> at 400 MHz                   | S16  |
| Figure S17 | <sup>13</sup> C NMR spectrum of <b>3</b> in CDCl <sub>3</sub> at 100 MHz                  | S17  |
| Figure S18 | <sup>1</sup> H- <sup>1</sup> H COSY spectrum of <b>3</b> in CDCl <sub>3</sub>             | S18  |
| Figure S19 | HSQC spectrum of <b>3</b> in CDCl <sub>3</sub>                                            | S19  |
| Figure S20 | HMBC spectrum of <b>3</b> in CDCl <sub>3</sub>                                            | S20  |
| Figure S21 | NOESY spectrum of <b>3</b> in CDCl <sub>3</sub>                                           | S21  |
| Figure S22 | HRESIMS spectrum of <b>4</b>                                                              | S22  |
| Figure S23 | <sup>1</sup> H NMR spectrum of <b>4</b> in CDCl <sub>3</sub> at 500 MHz                   | S23  |
| Figure S24 | <sup>13</sup> C NMR spectrum of <b>4</b> in CDCl <sub>3</sub> at 125 MHz                  | S24  |
| Figure S25 | <sup>1</sup> H- <sup>1</sup> H COSY spectrum of <b>4</b> in CDCl <sub>3</sub>             | S25  |
| Figure S26 | HSQC spectrum of <b>4</b> in CDCl <sub>3</sub>                                            | S26  |
| Figure S27 | HMBC spectrum of <b>4</b> in CDCl <sub>3</sub>                                            | S27  |
| Figure S28 | NOESY spectrum of <b>4</b> in CDCl <sub>3</sub>                                           | S28  |

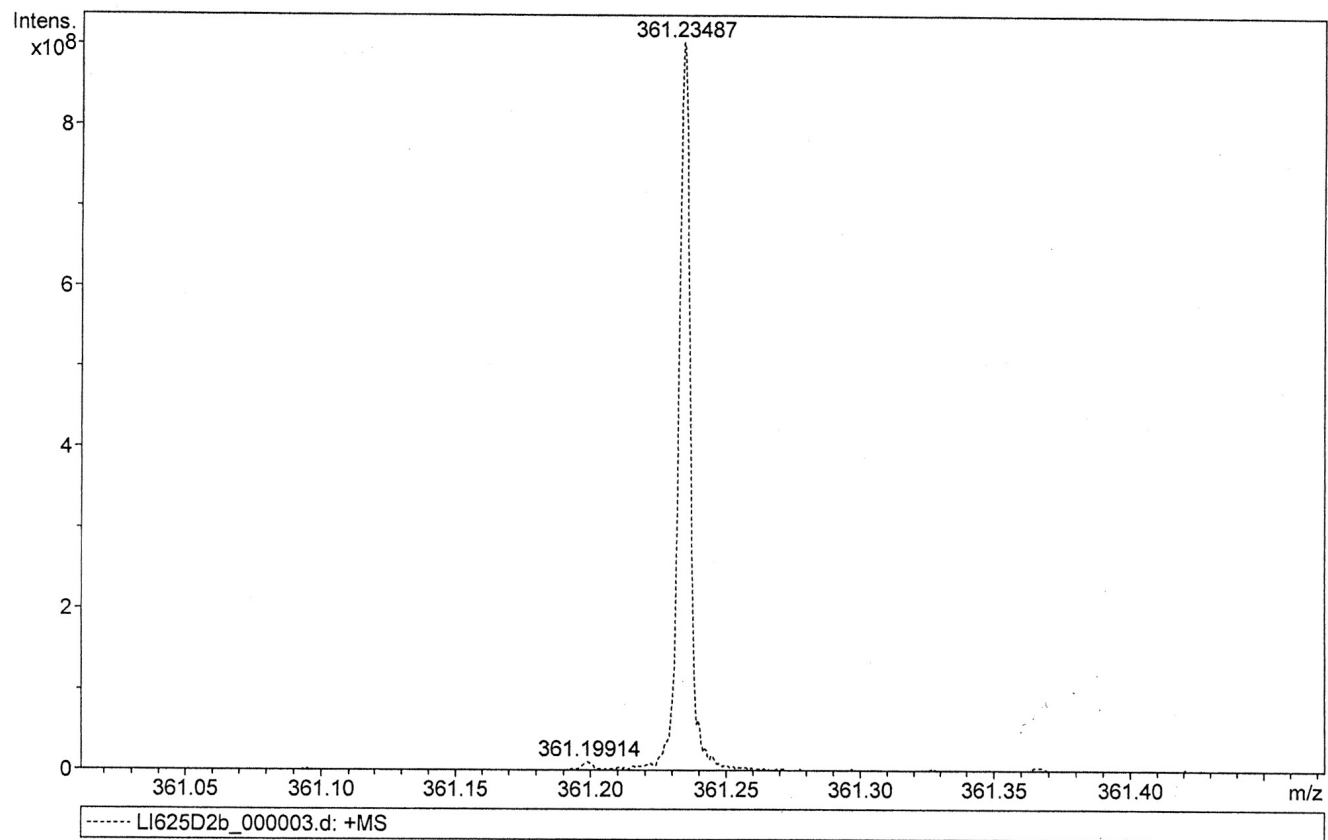

| Meas. m/z | # | Formula                                          | Score  | m/z       | err [mDa] | err [ppm] | mSigma | rdb | e <sup>-</sup> Conf | N-Rule |
|-----------|---|--------------------------------------------------|--------|-----------|-----------|-----------|--------|-----|---------------------|--------|
| 361.23487 | 1 | C <sub>20</sub> H <sub>34</sub> NaO <sub>4</sub> | 100.00 | 361.23493 | 0.06      | 0.17      | 8.7    | 3.5 | even                | ok     |

**Figure S1.** HRESIMS spectrum of **1**.

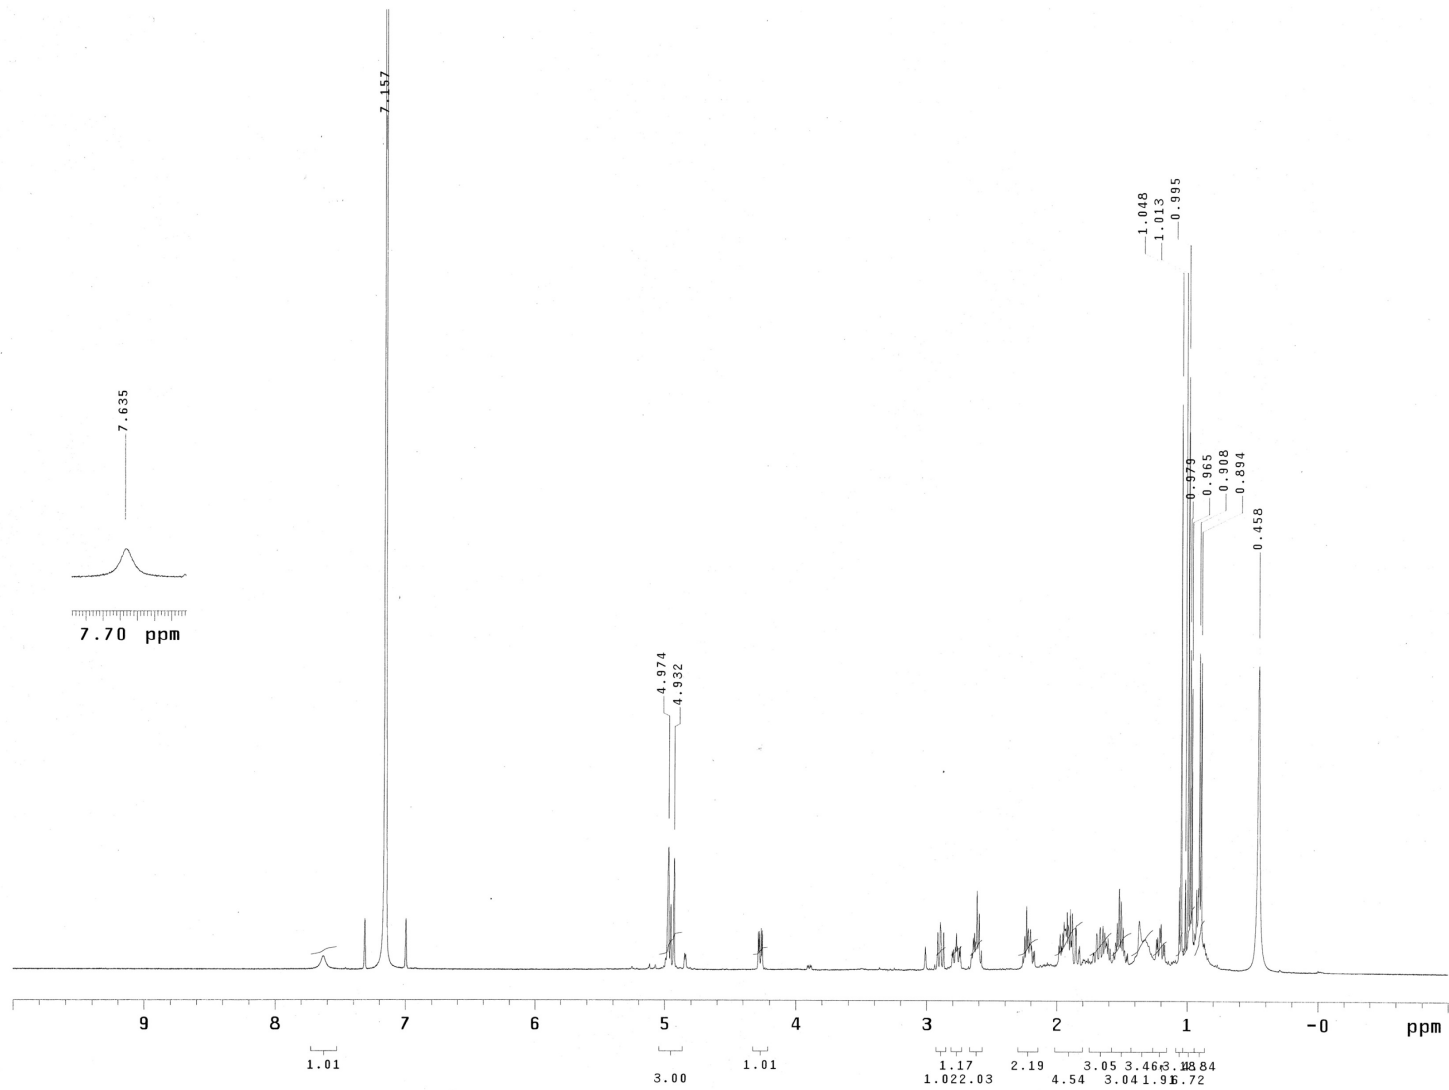

**Figure S2.**  $^1\text{H}$  NMR spectrum of **1** in  $\text{C}_6\text{D}_6$  at 500 MHz.

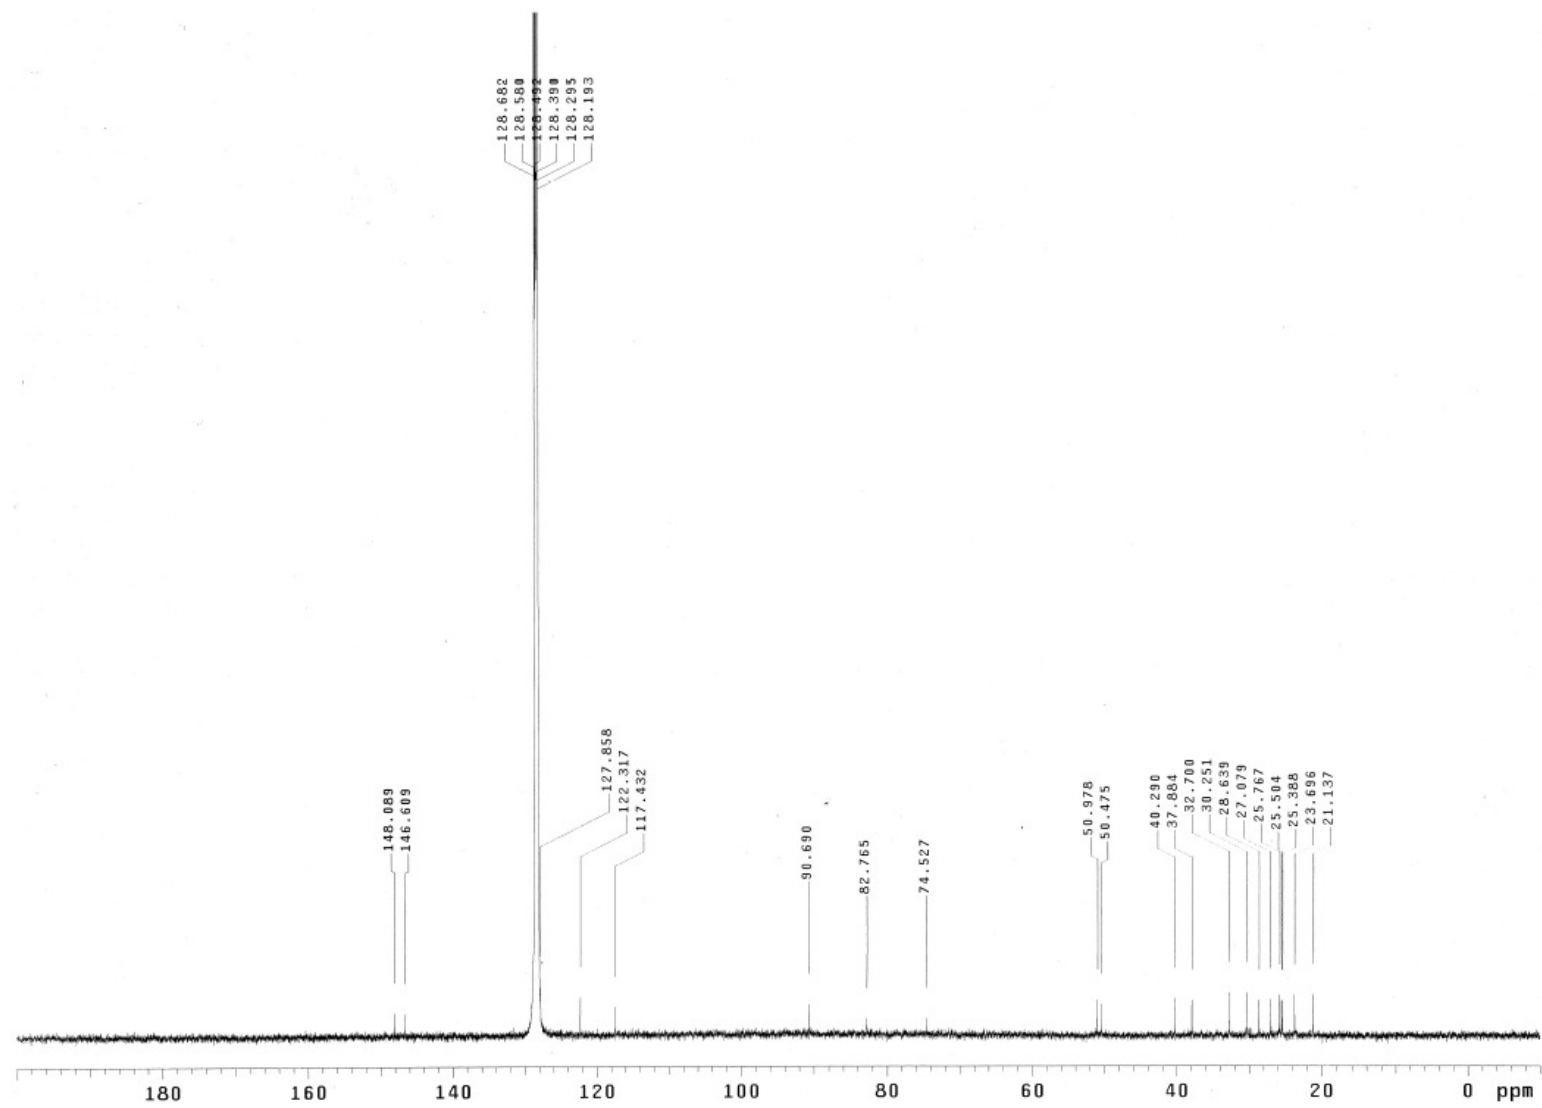

**Figure S3.**  $^{13}\text{C}$  NMR spectrum of **1** in  $\text{C}_6\text{D}_6$  at 125 MHz.

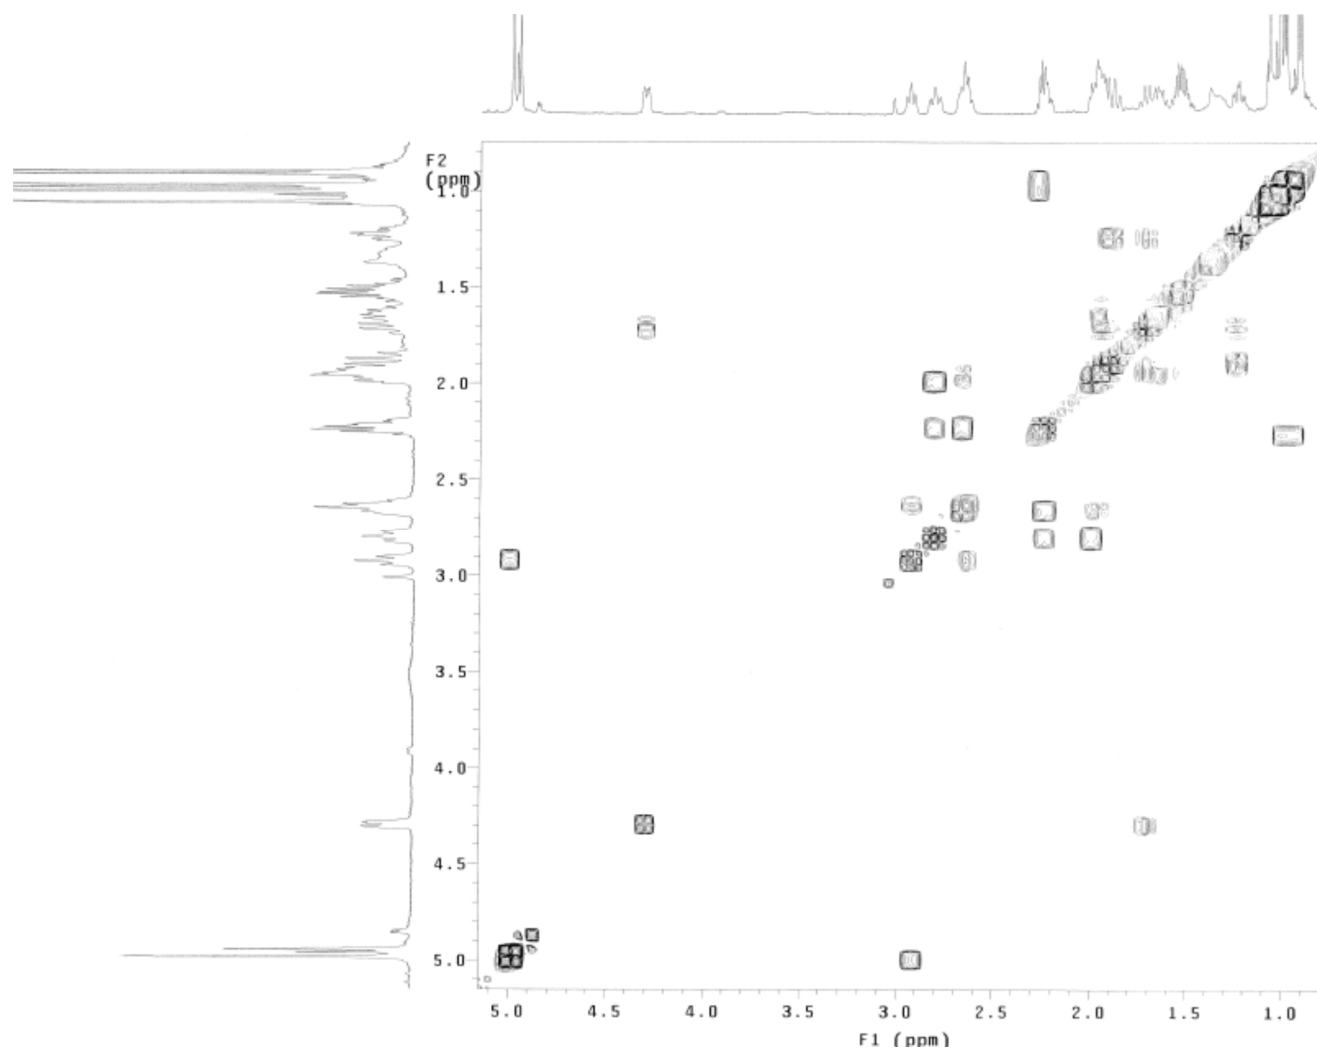

**Figure S4.**  $^1\text{H}$ - $^1\text{H}$  COSY spectrum of **1** in  $\text{C}_6\text{D}_6$ .

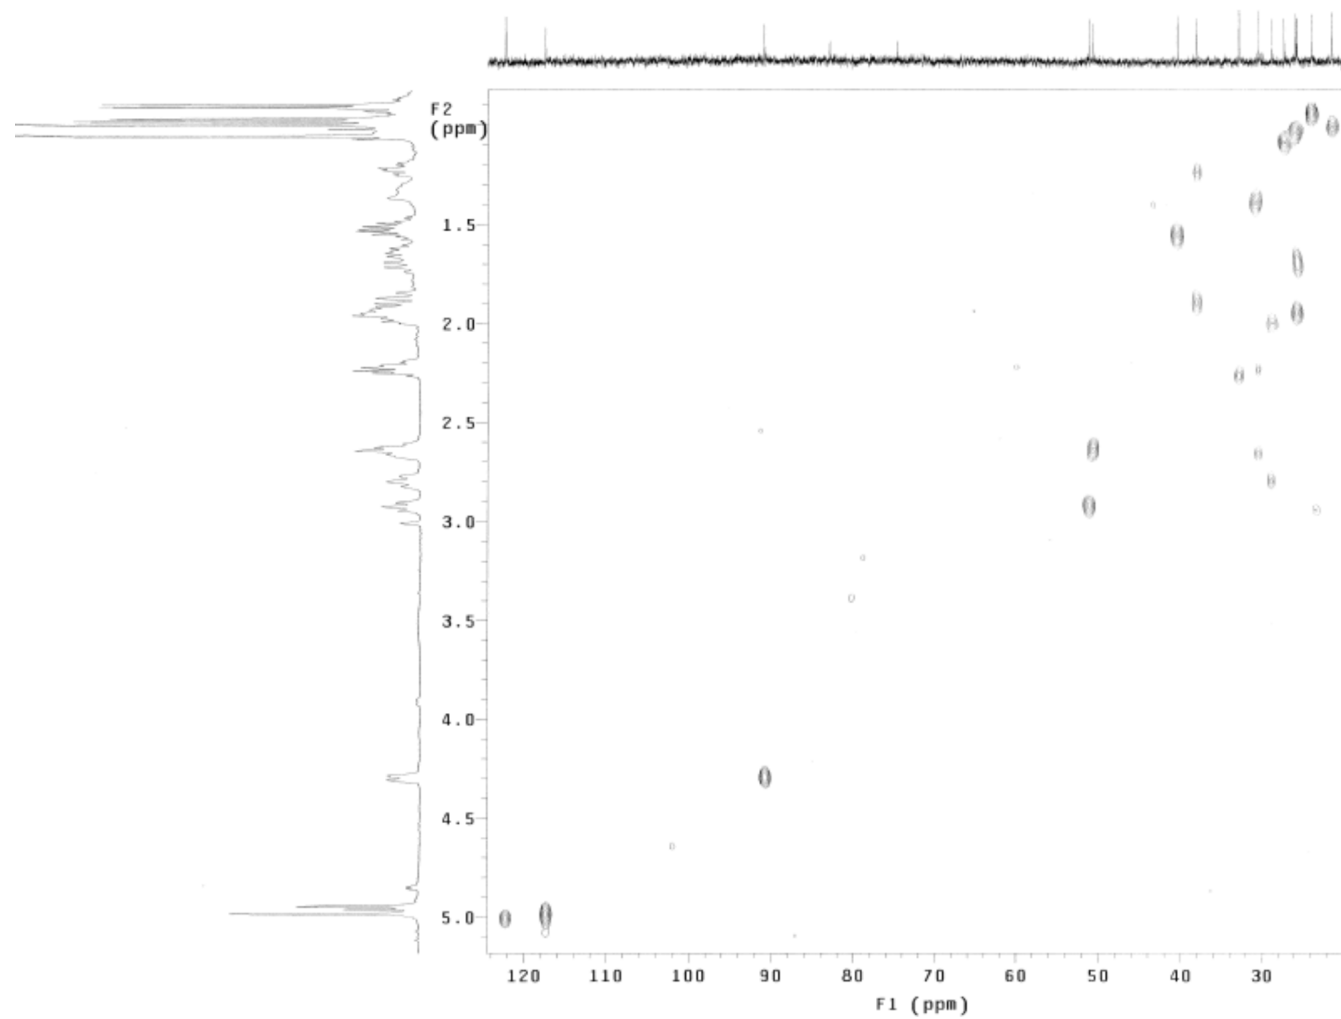

**Figure S5.** HSQC spectrum of **1** in  $\text{C}_6\text{D}_6$ .

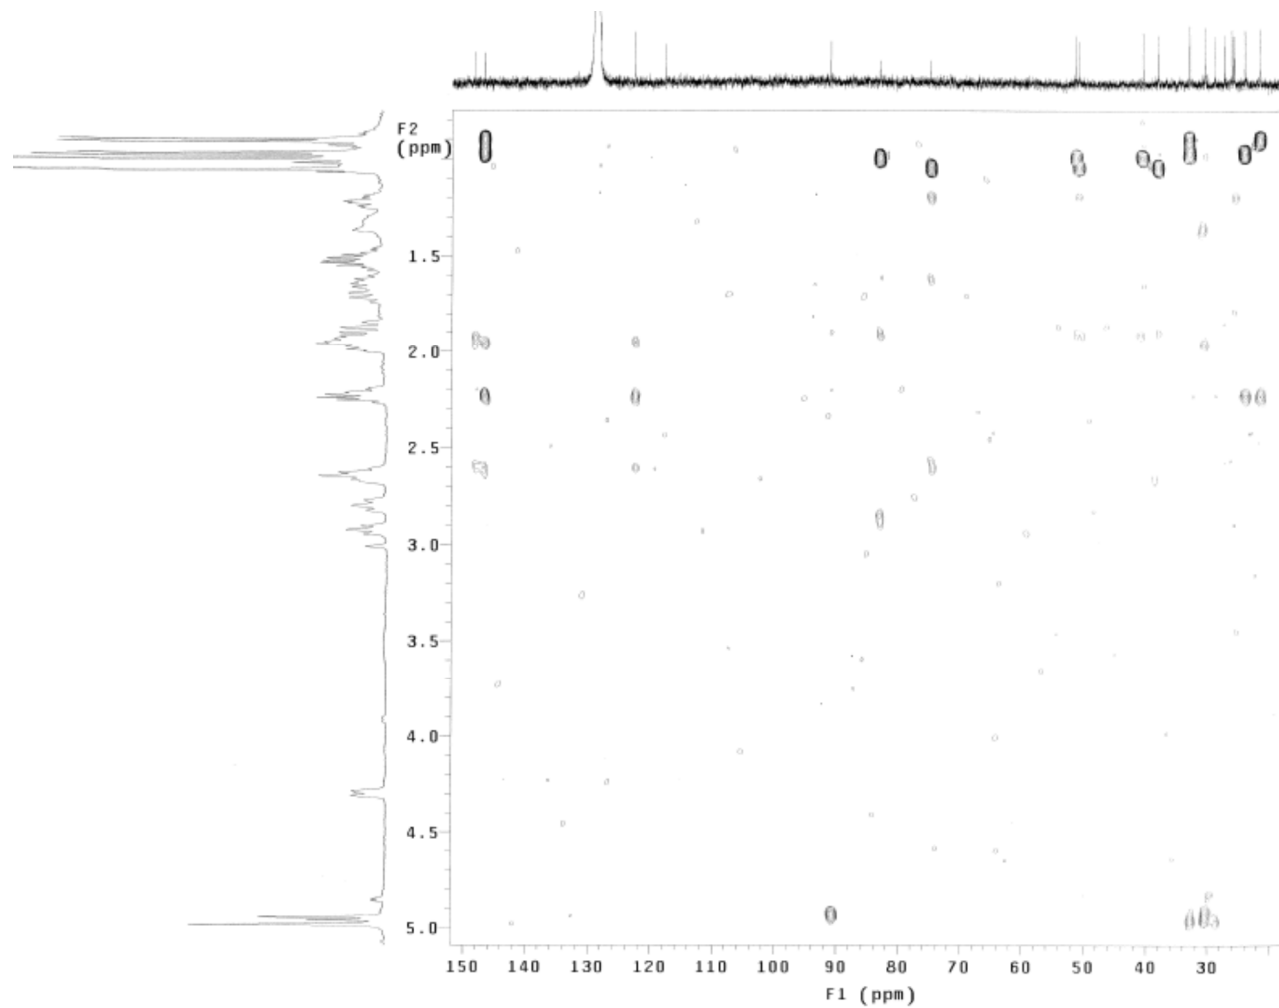

**Figure S6.** HMBC spectrum of **1** in  $\text{C}_6\text{D}_6$ .

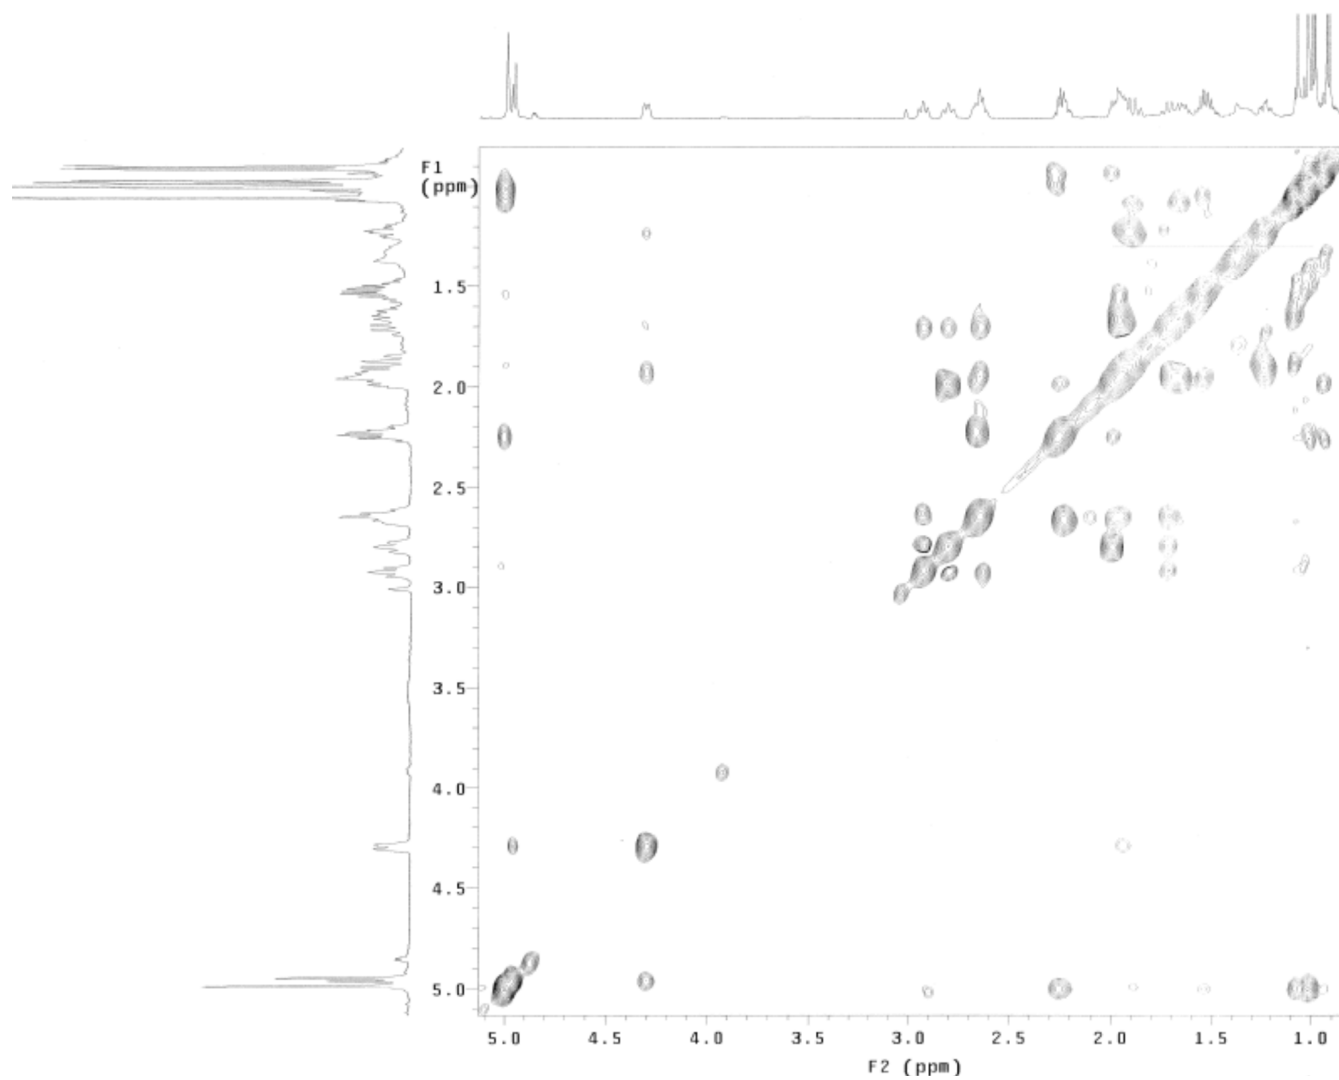

**Figure S7** NOESY spectrum of **1** in  $C_6D_6$ .



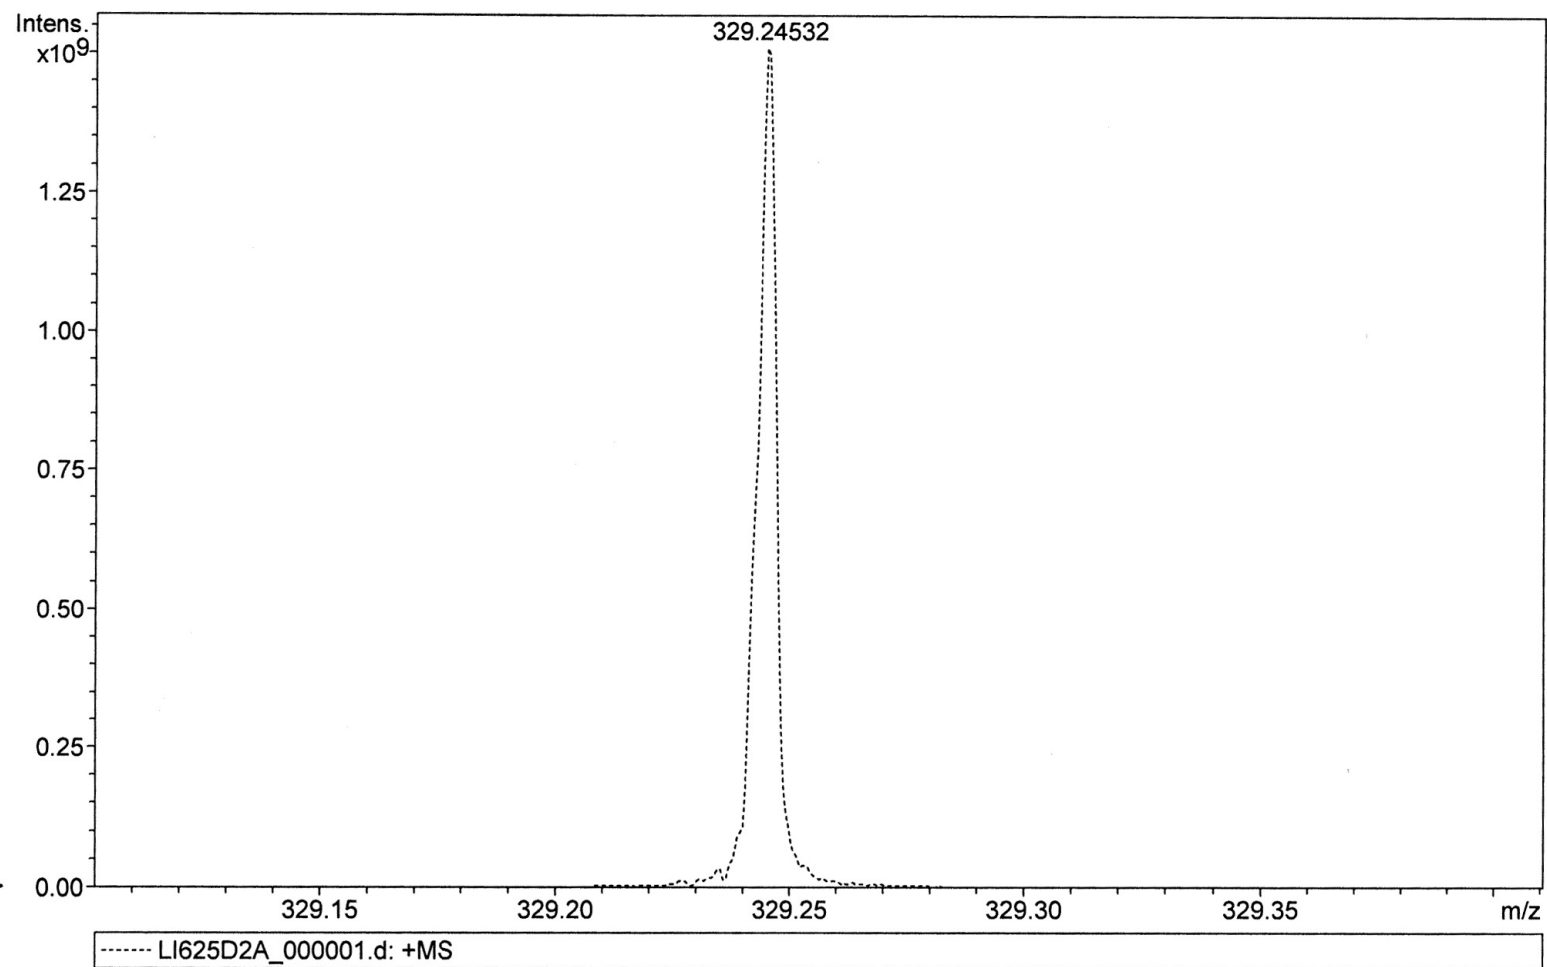

| Meas. m/z | # | Formula                                          | Score  | m/z       | err [mDa] | err [ppm] | mSigma | rdb | e <sup>-</sup> Conf | N-Rule |
|-----------|---|--------------------------------------------------|--------|-----------|-----------|-----------|--------|-----|---------------------|--------|
| 329.24532 | 1 | C <sub>20</sub> H <sub>34</sub> NaO <sub>2</sub> | 100.00 | 329.24510 | -0.22     | -0.66     | 3.2    | 3.5 | even                | ok     |

**Figure S8.** HRESIMS spectrum of **2**.

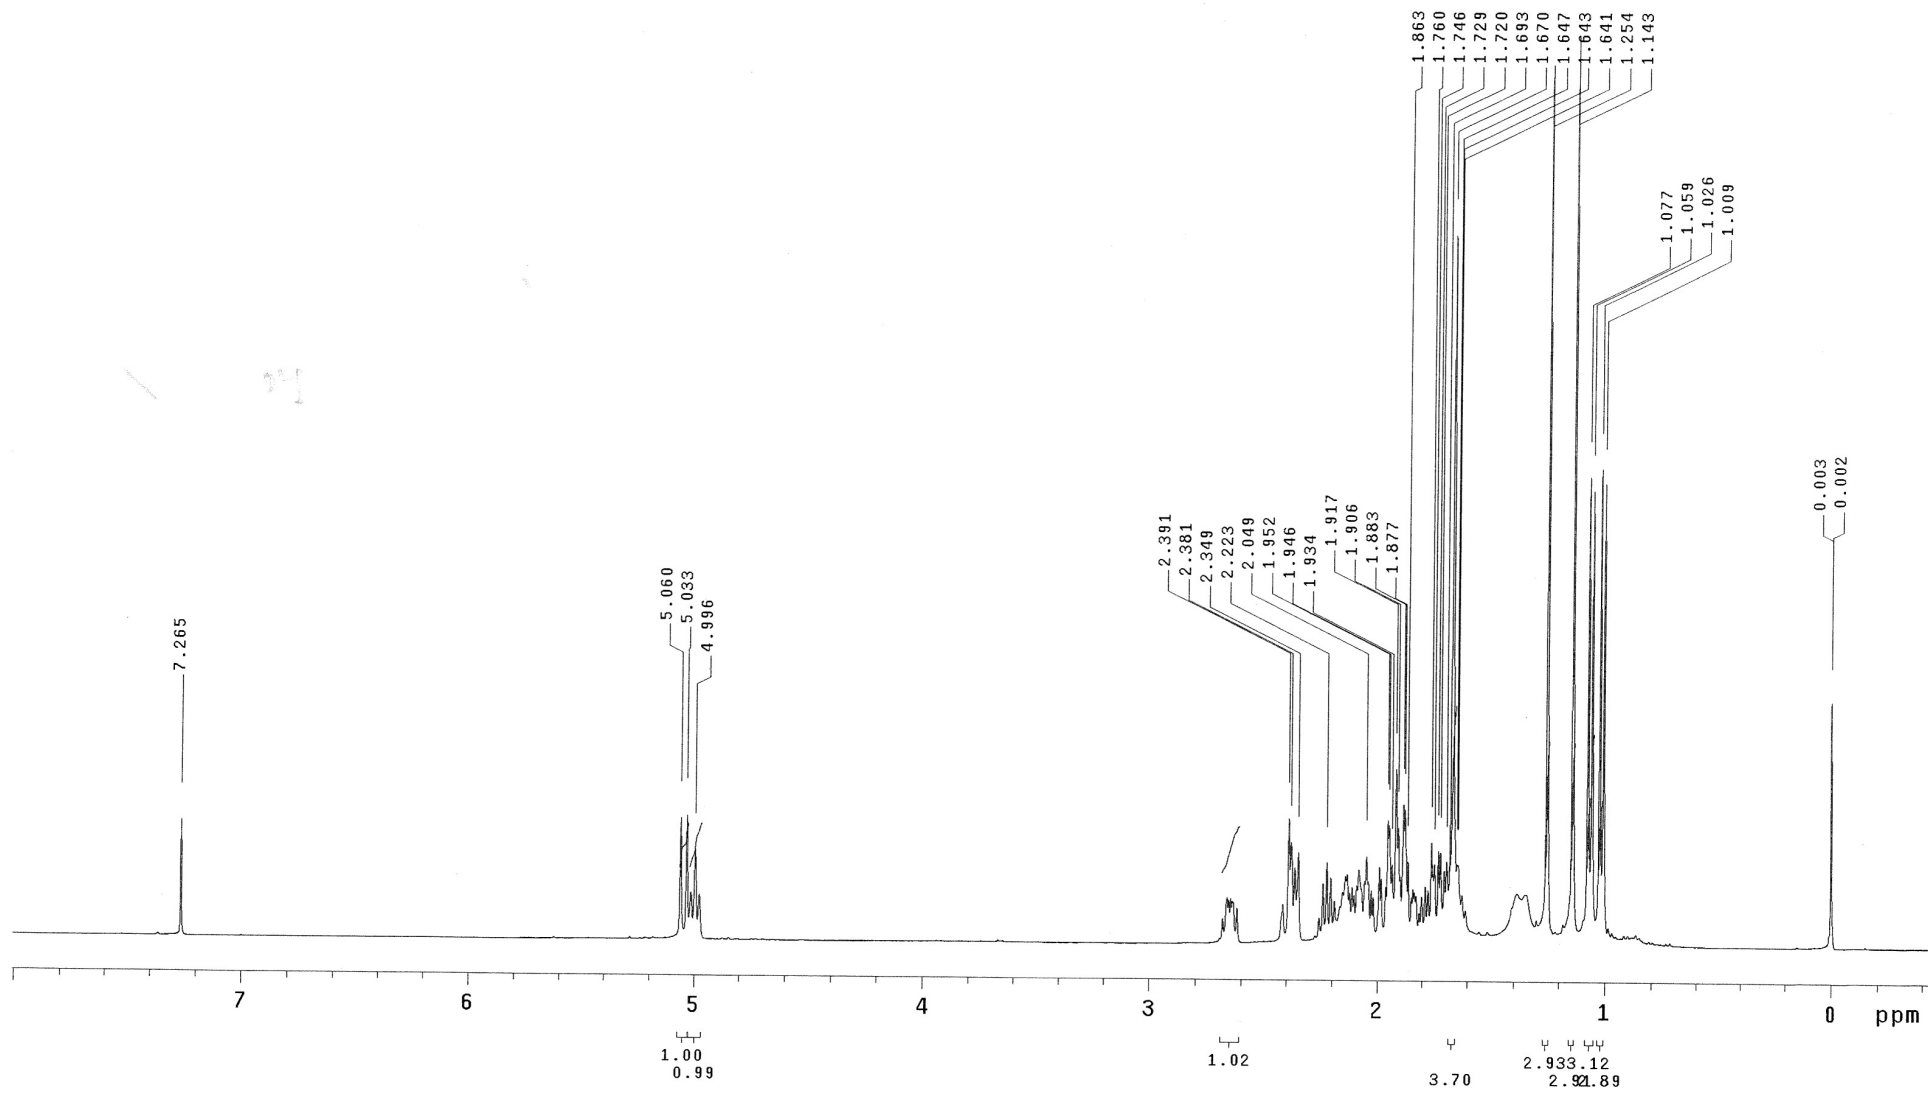

Figure

S9. <sup>1</sup>H NMR spectrum of **2** in CDCl<sub>3</sub> at 400 MHz.

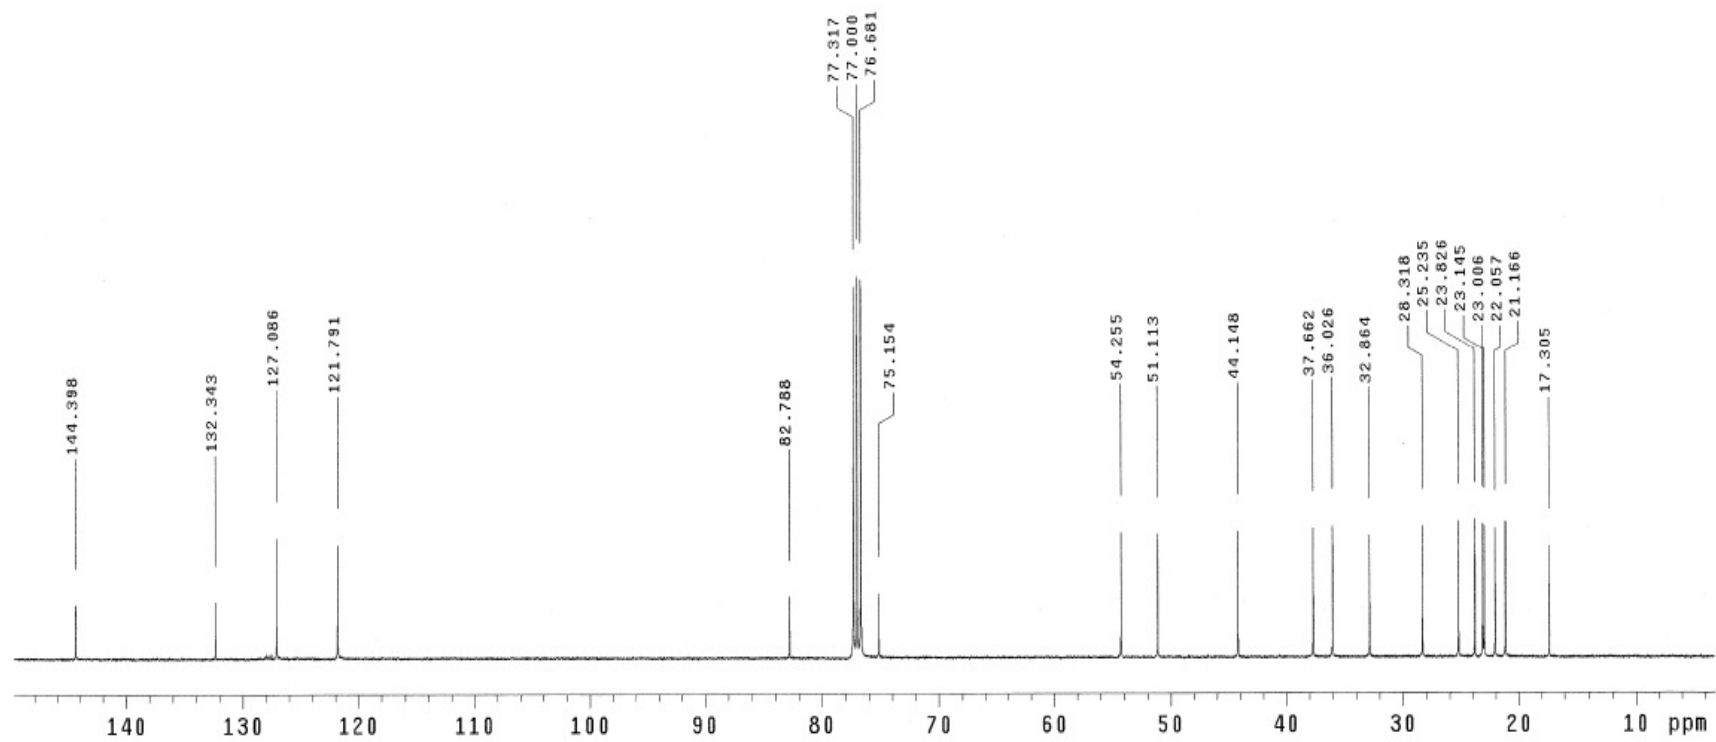

**Figure S10.** <sup>13</sup>C NMR spectrum of **2** in CDCl<sub>3</sub> at 100 MHz.

LI6-25-d-2-d(2)

Sample Name:  
LI6-25-d-2-a-2  
Data Collected on:  
Varian-NMR-vnmrs400  
Archive directory:  
/home/sheu/vnmrsys/data  
Sample directory:  
LI6-25-d-2-a-2\_20140112\_01  
Fidfile: gCOSY\_01

Pulse Sequence: gCOSY  
Solvent: cdc13  
Data collected on: Jan 13 2014

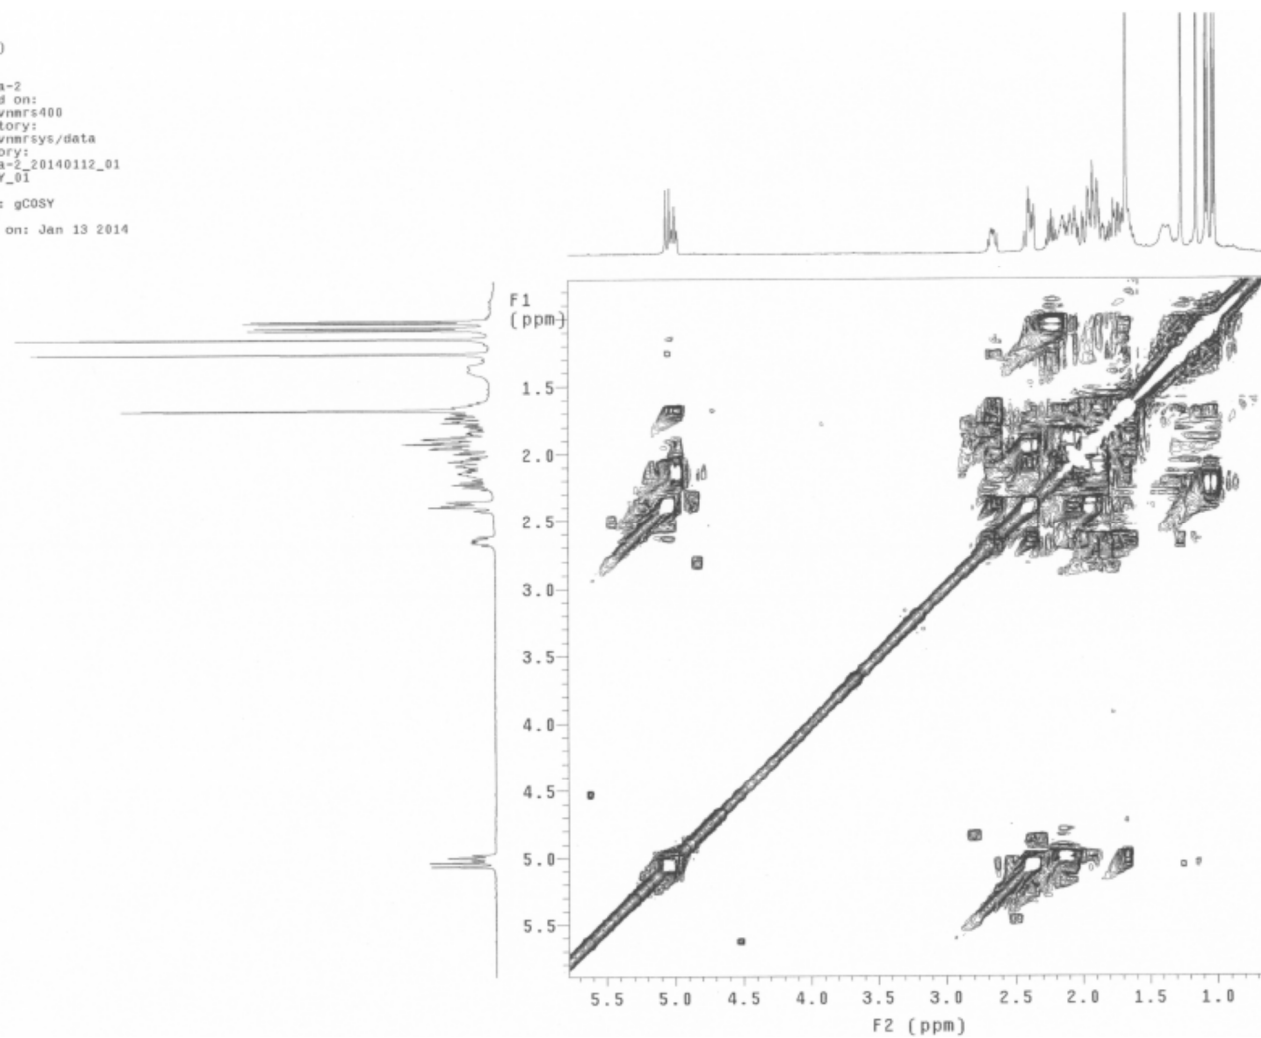

**Figure S11.**  $^1\text{H}$ - $^1\text{H}$  COSY spectrum of **2** in  $\text{CDCl}_3$ .

LI6-25-d-2-a(2)

Sample Name:  
LI6-25-d-2-a-2  
Data Collected On:  
Varian-NMR-vnmrs400  
Archive directory:  
/home/sheu/vnmrsys/data  
Sample directory:  
LI6-25-d-2-a-2\_20140112\_01  
Fidfile: HSQCAD\_01

Pulse Sequence: HSQCAD  
Solvent: cdc13  
Data collected on: Jan 13 2014

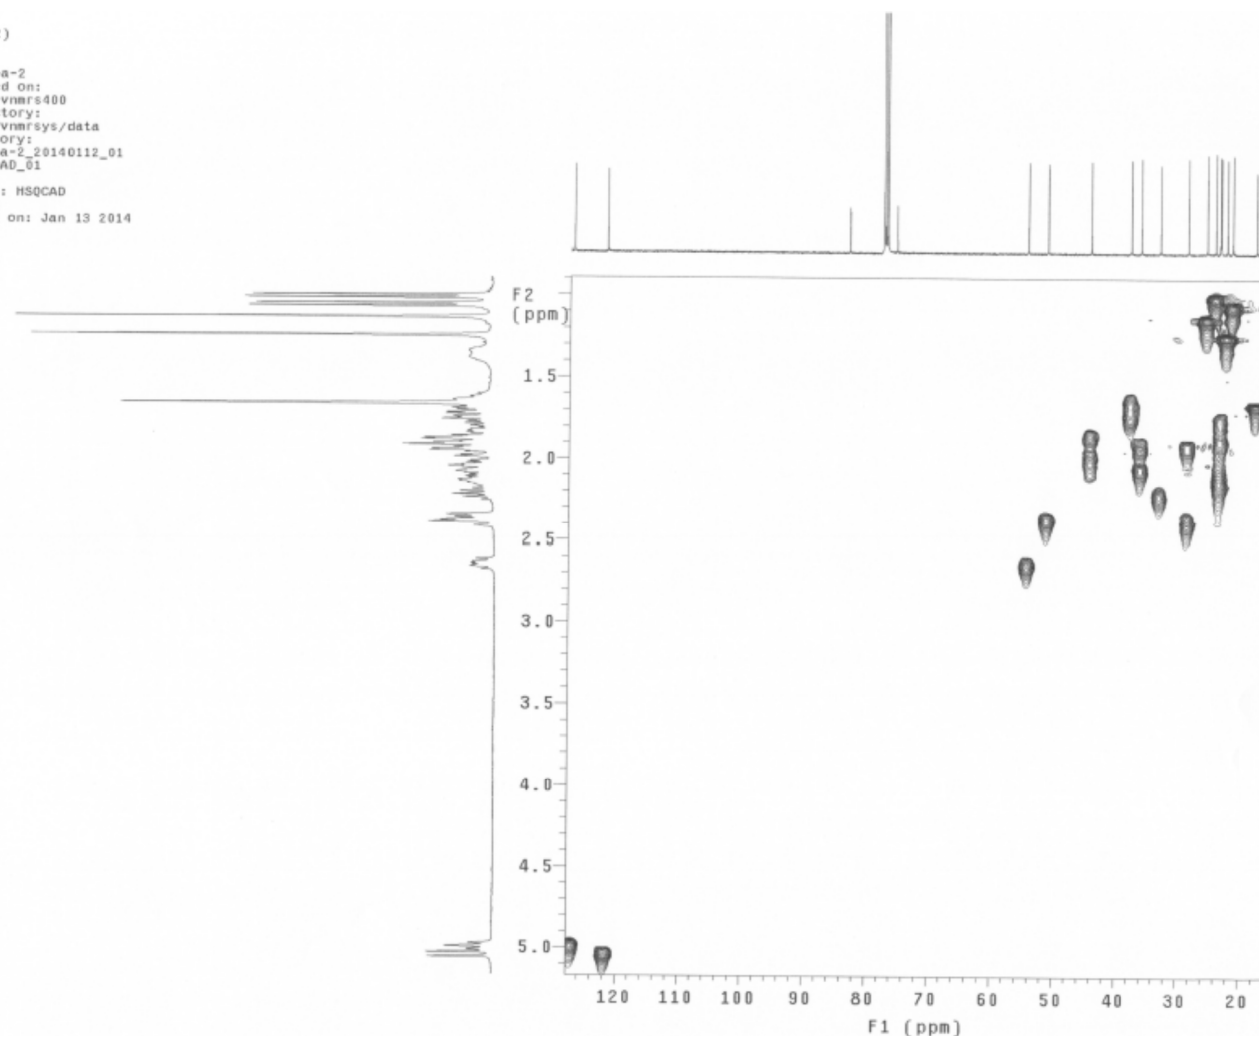

**Figure S12.** HSQC spectrum of **2** in  $\text{CDCl}_3$ .

LI6-25-d-2-a(2)

Sample Name:  
LI6-25-d-2-a-2  
Data Collected on:  
Varian-NMR-vnmrs400  
Archive directory:  
/home/sheu/vnmrsys/data  
Sample directory:  
LI6-25-d-2-a-2\_20140112\_01  
FidFile: gHMBCAD\_01

Pulse Sequence: gHMBCAD  
Solvent: cdcl3  
Date collected on: Jan 13 2014

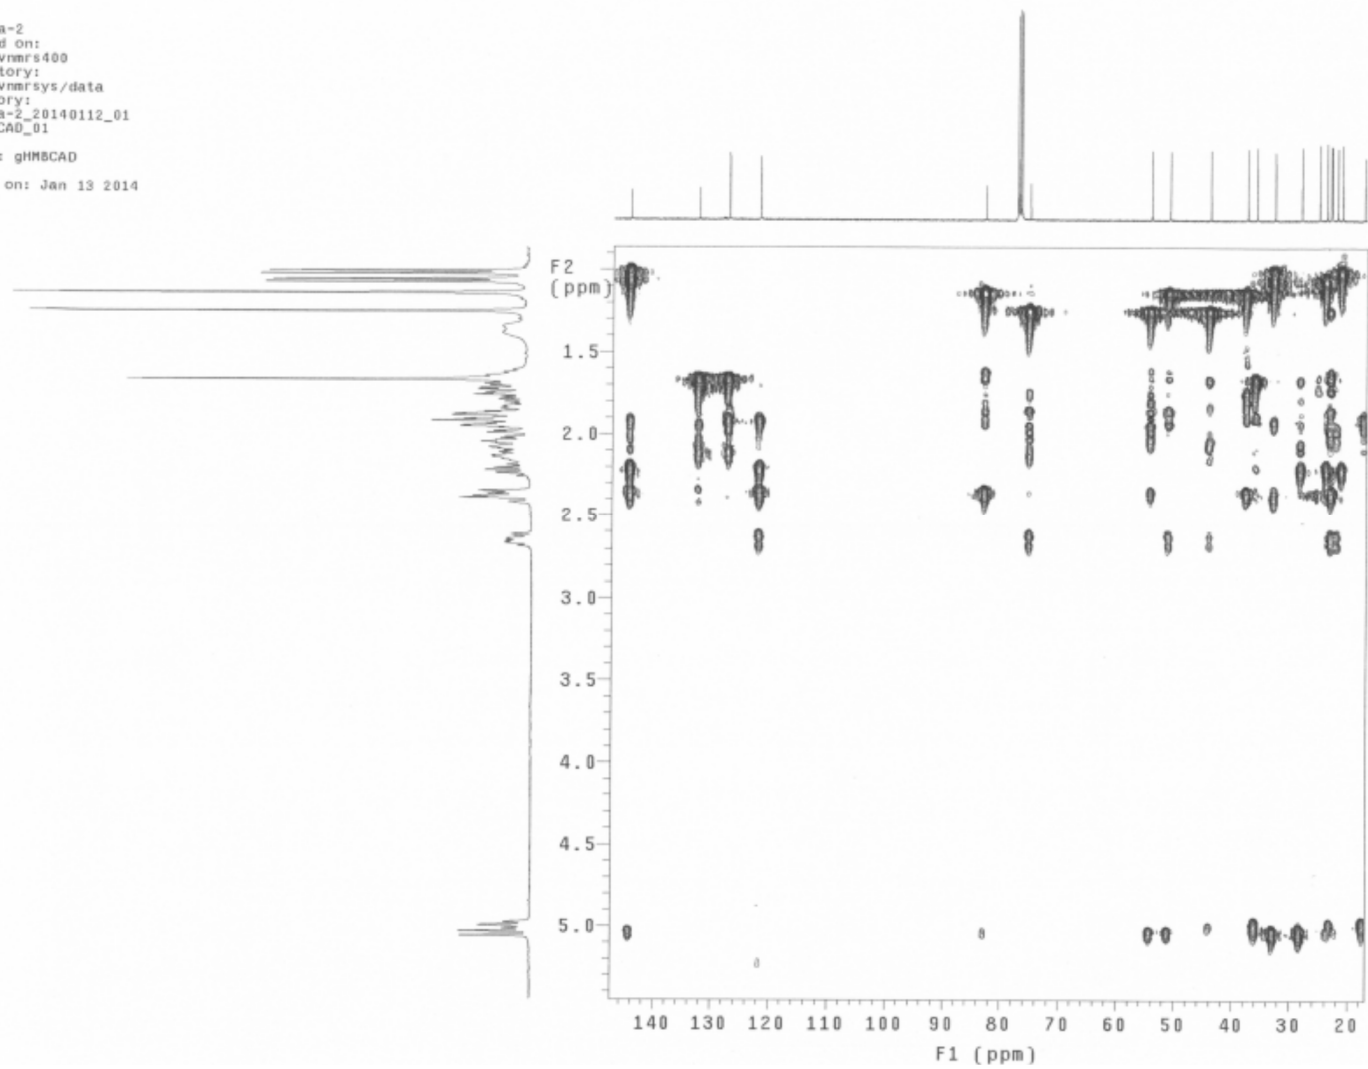

Figure S13. HMBC spectrum of **2** in CDCl<sub>3</sub>.

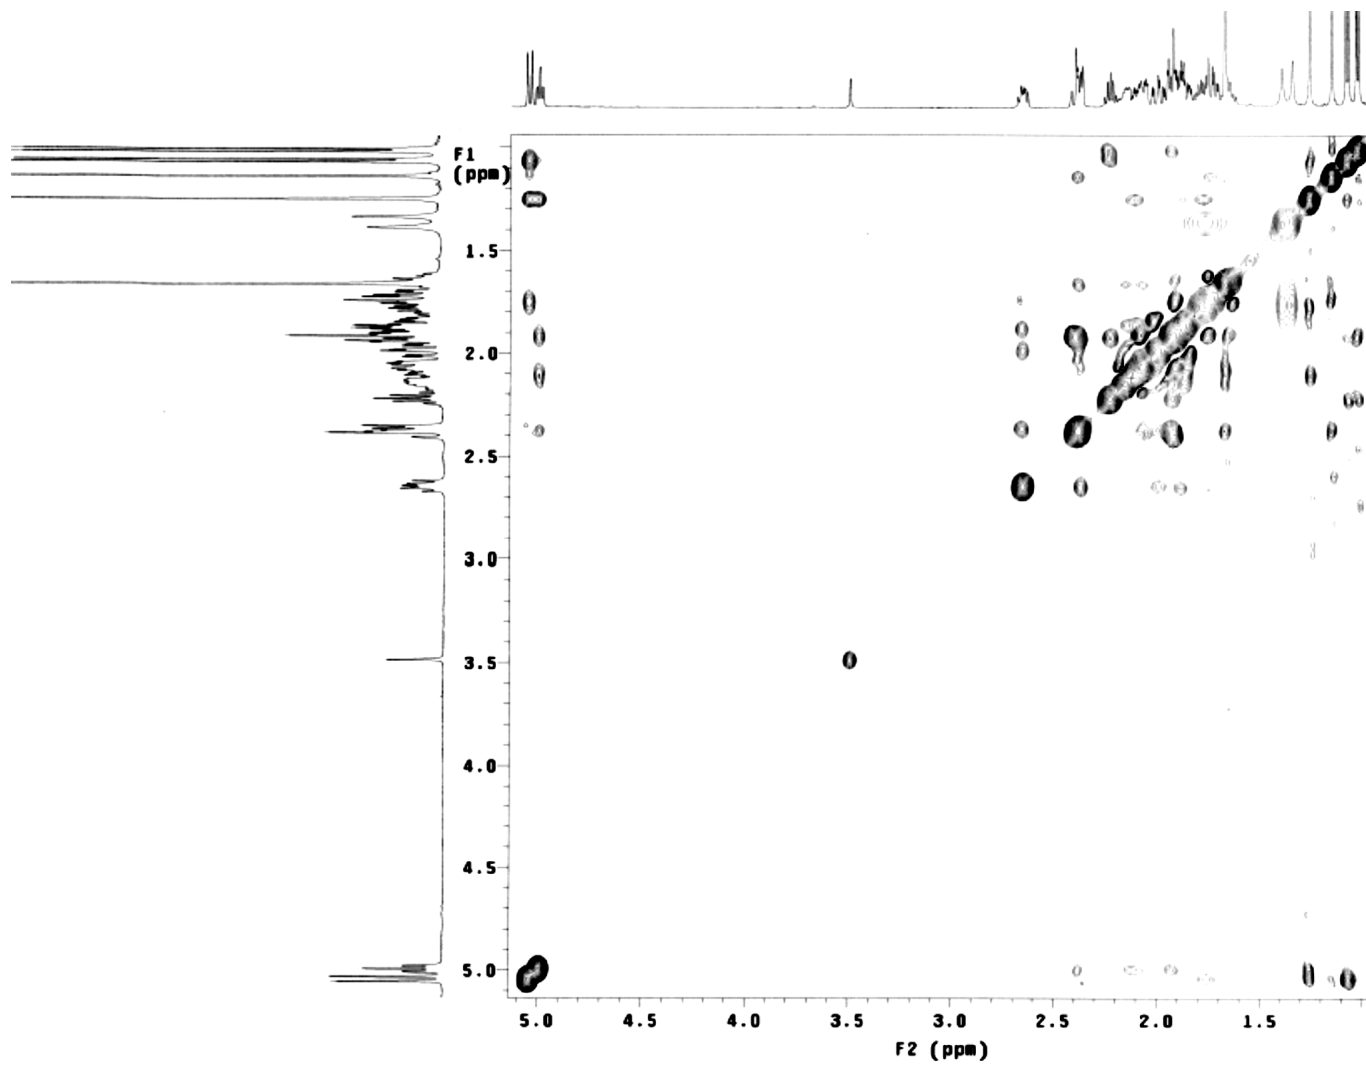

Figure S14. NOESY spectrum of **2** in CDCl<sub>3</sub>.

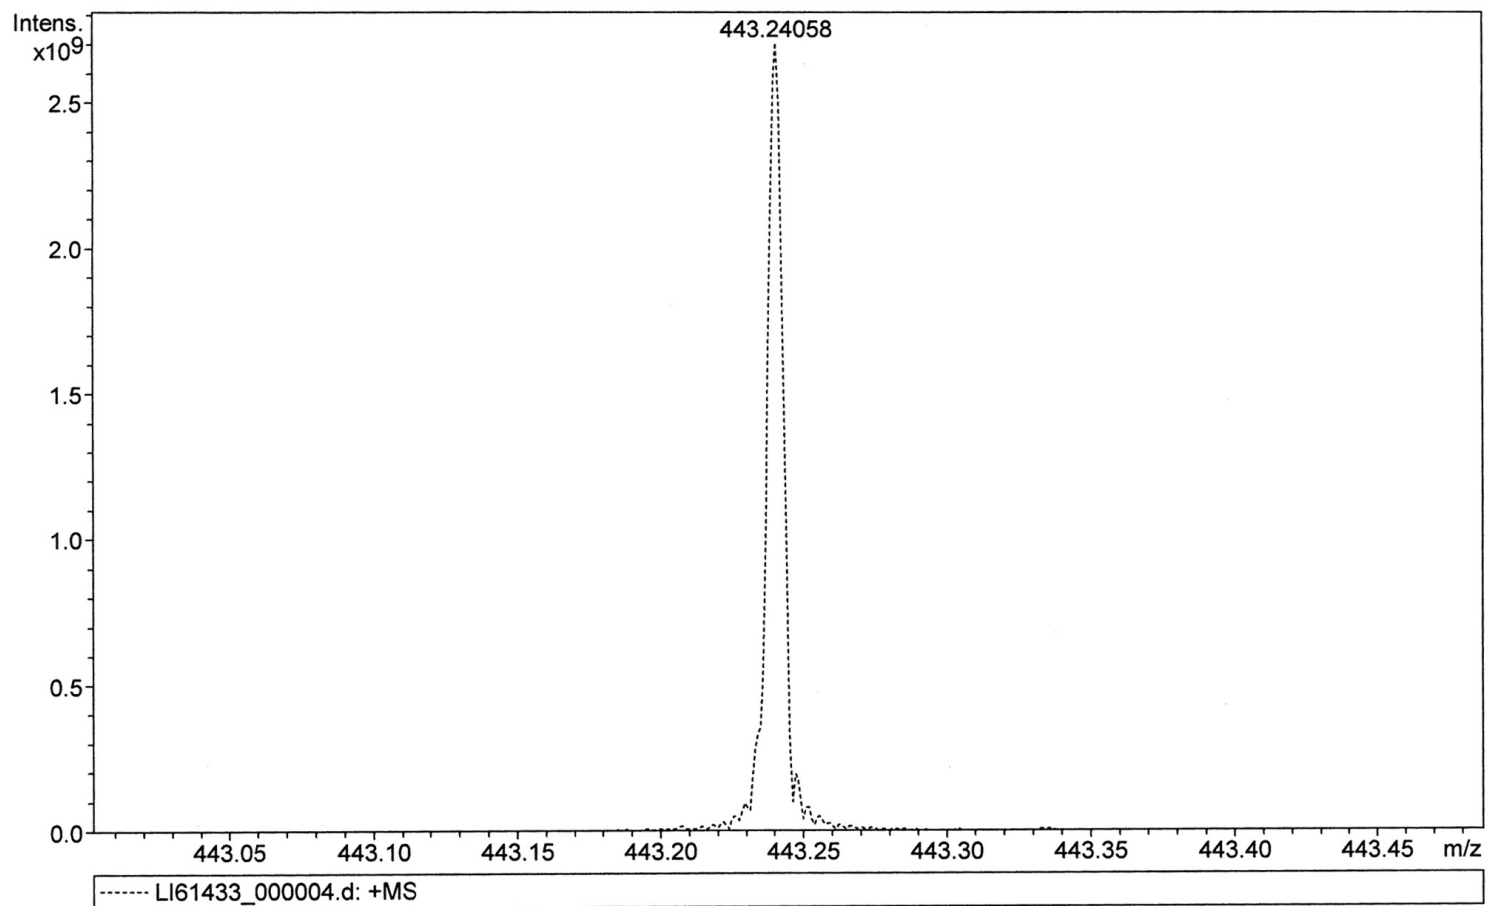

| Meas. m/z | # | Formula                                          | Score  | m/z       | err [mDa] | err [ppm] | mSigma | rdb | e <sup>-</sup> Conf | N-Rule |
|-----------|---|--------------------------------------------------|--------|-----------|-----------|-----------|--------|-----|---------------------|--------|
| 443.24058 | 1 | C <sub>24</sub> H <sub>36</sub> NaO <sub>6</sub> | 100.00 | 443.24041 | -0.17     | -0.38     | 9.9    | 6.5 | even                | ok     |

**Figure S15.** HRESIMS spectrum of **3**.



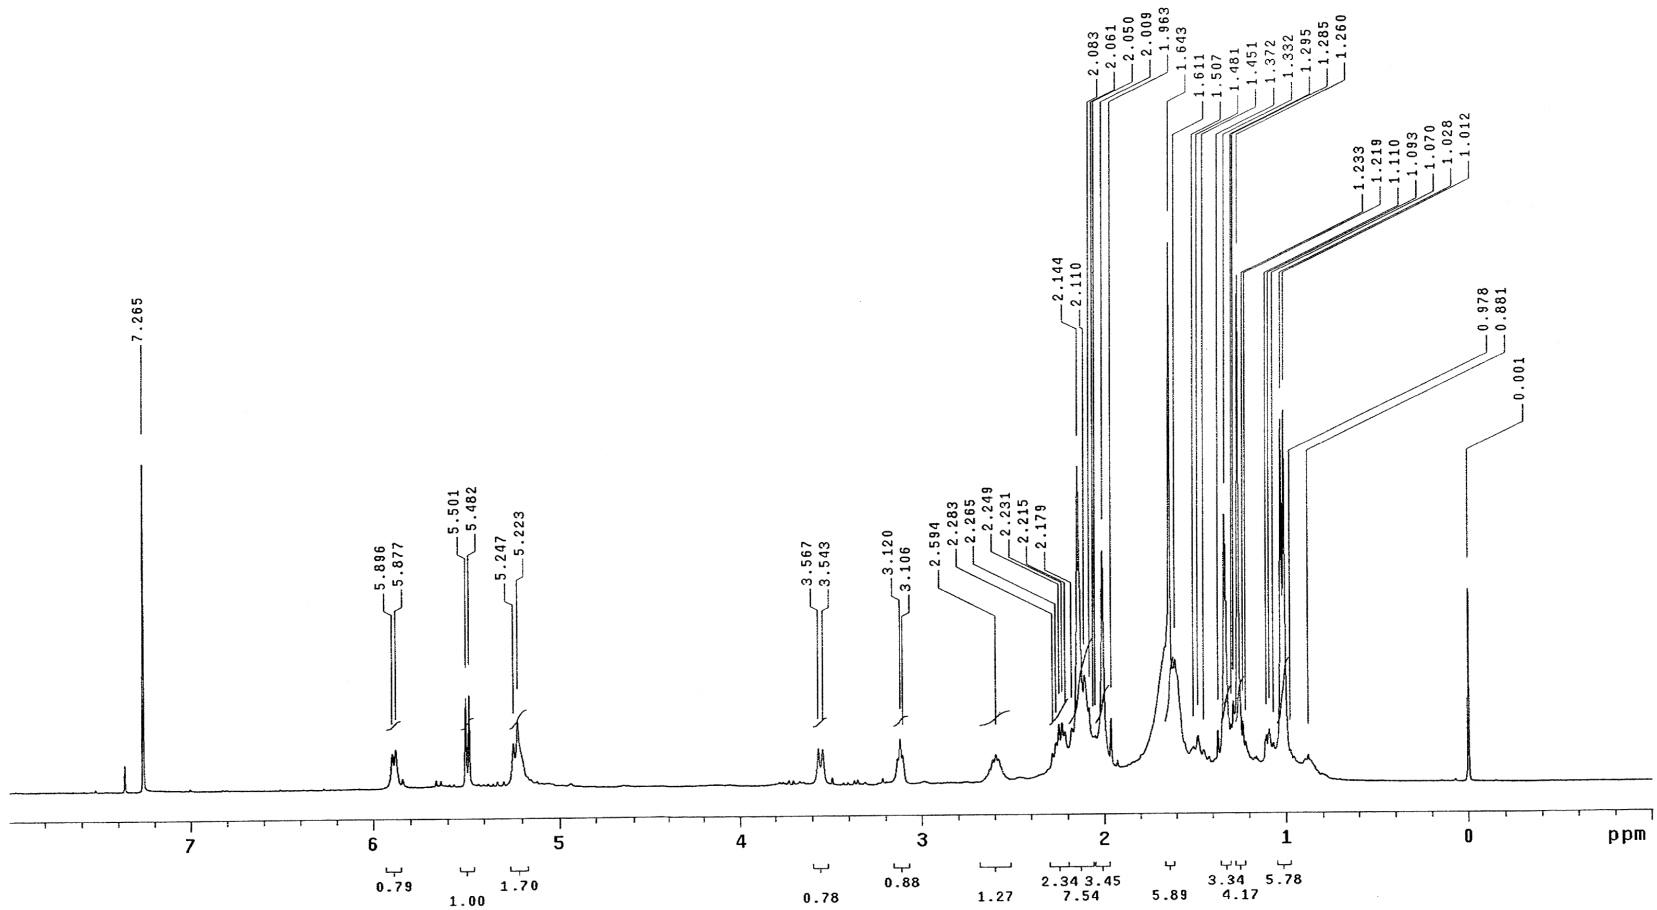

**Figure S16.** <sup>1</sup>H NMR spectrum of **3** in CDCl<sub>3</sub> at 400 MHz.

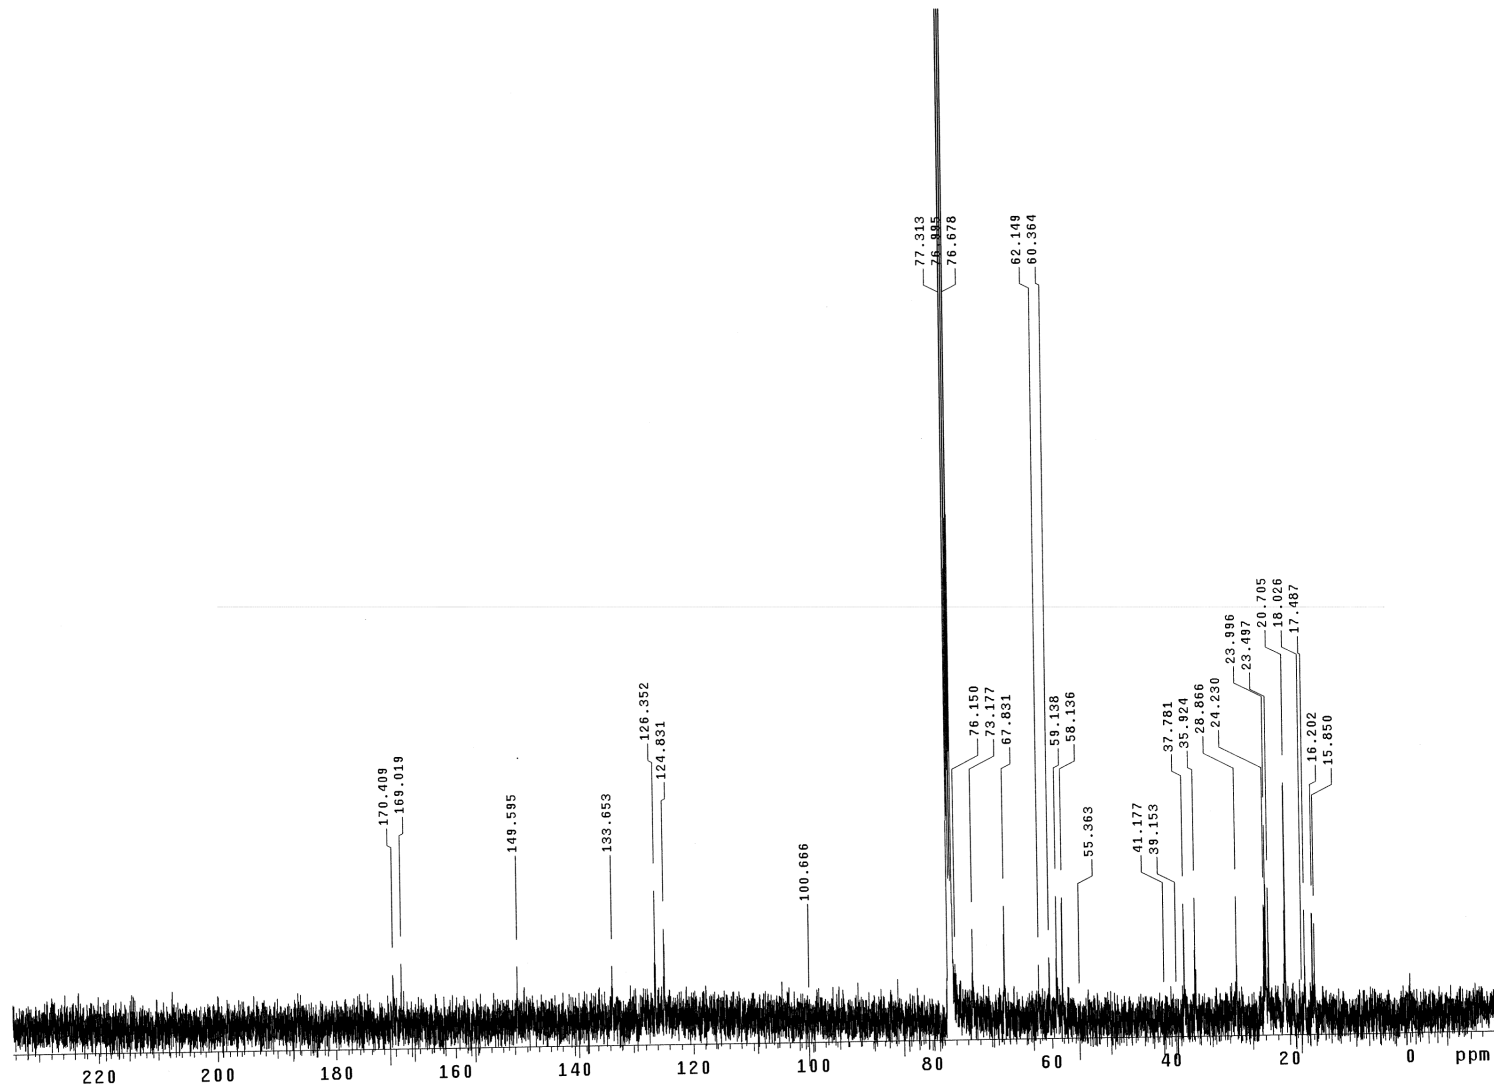

Figure S17.  $^{13}\text{C}$  NMR spectrum of **3** in  $\text{CDCl}_3$  at 100 MHz.

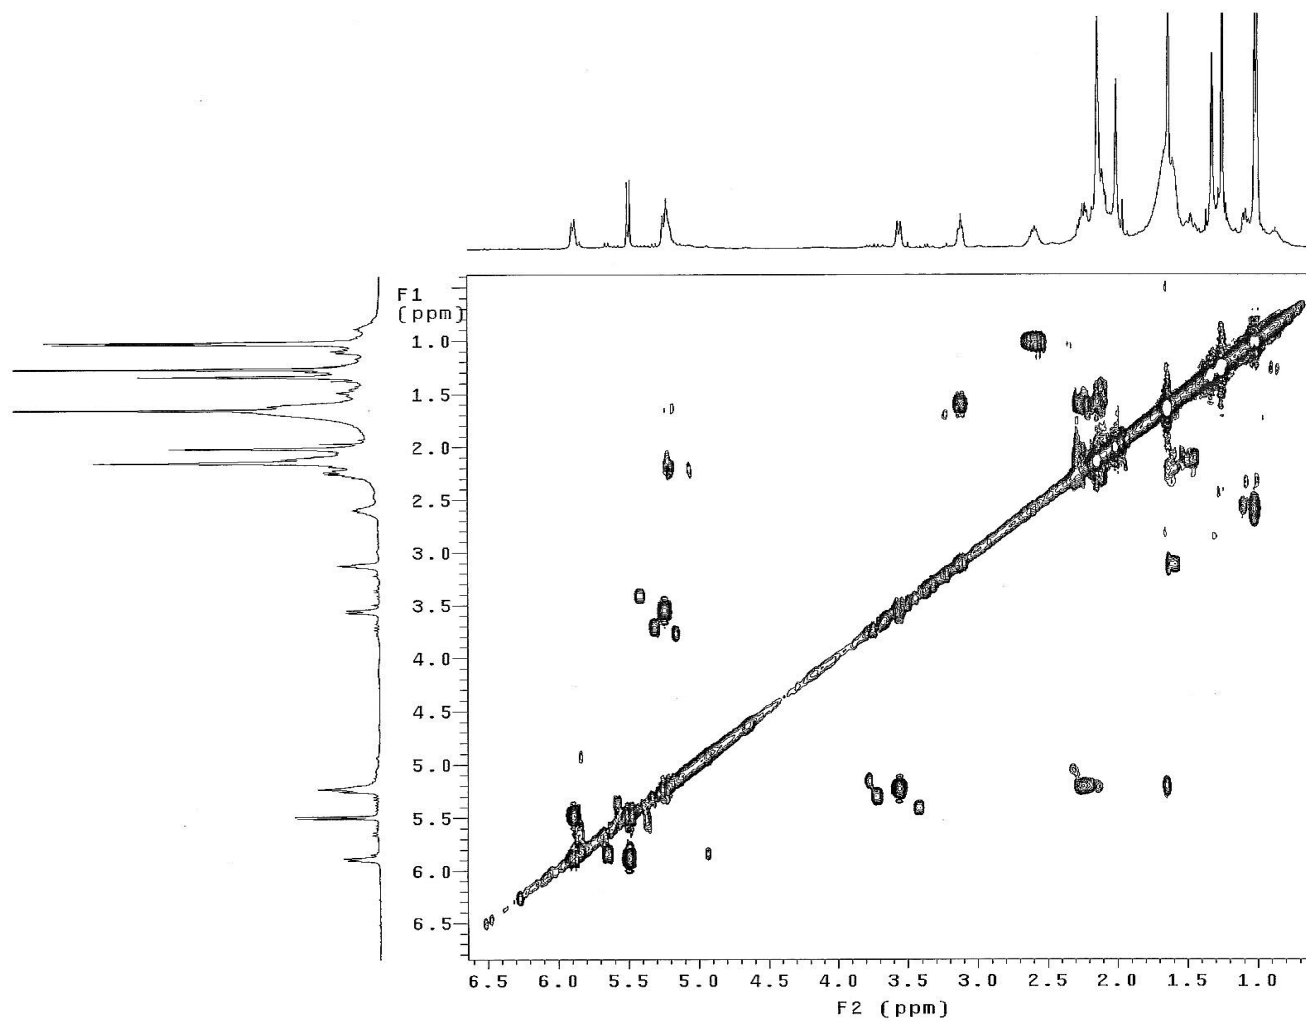

**Figure S18.**  $^1\text{H}$ - $^1\text{H}$  COSY spectrum of **3** in  $\text{CDCl}_3$ .

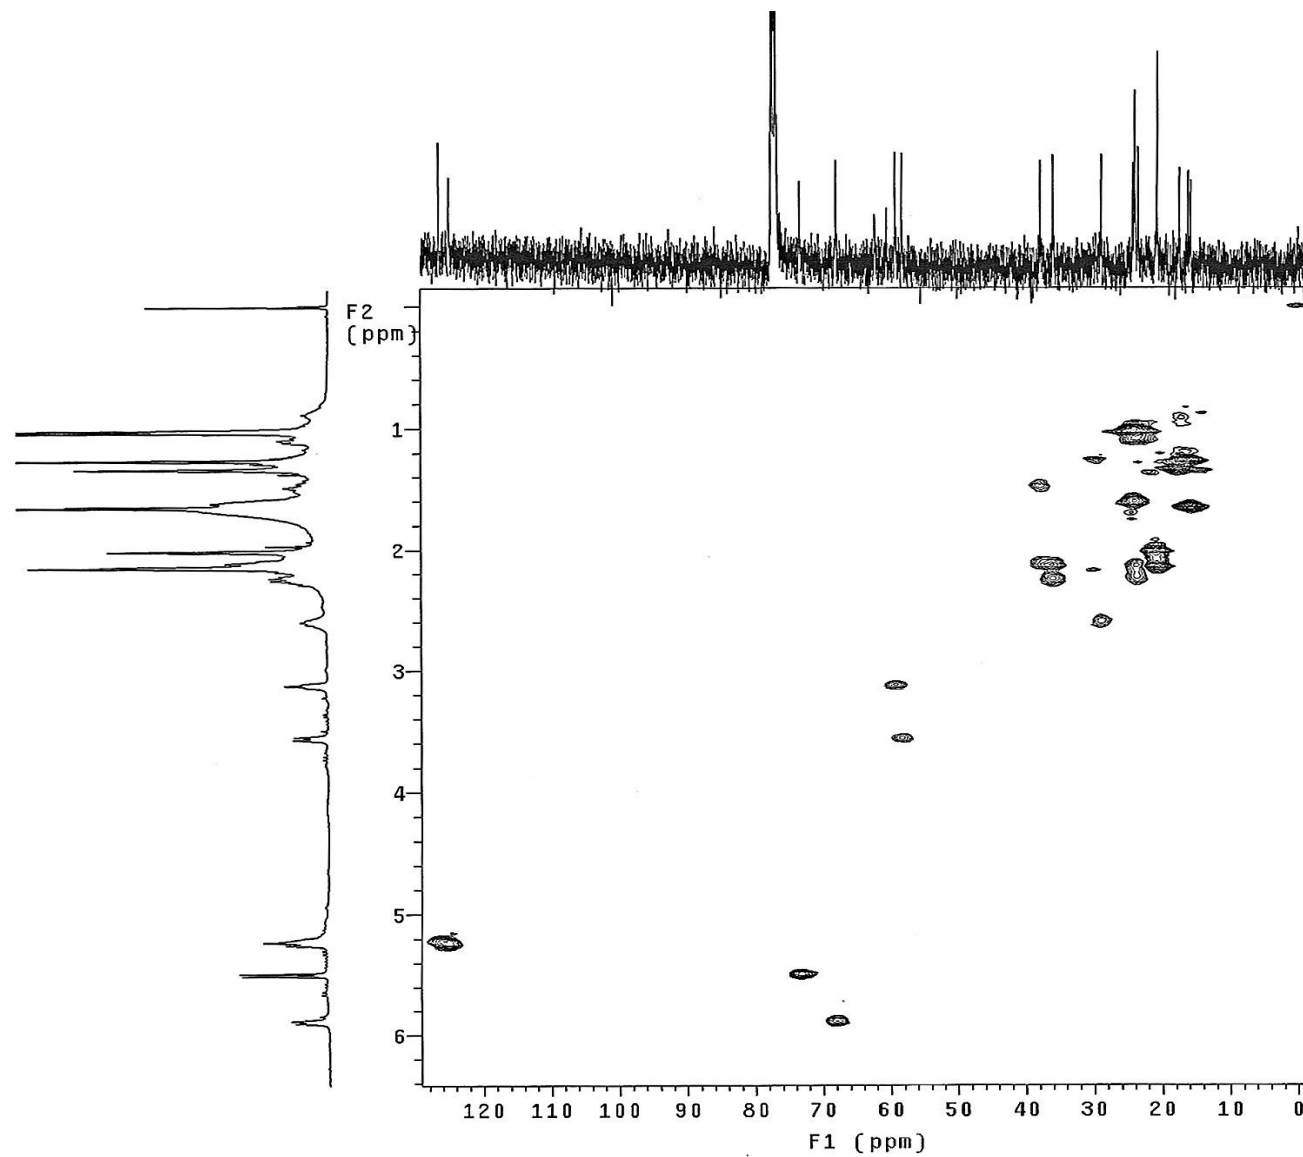

**Figure S19.** HSQC spectrum of **3** in CDCl<sub>3</sub>.

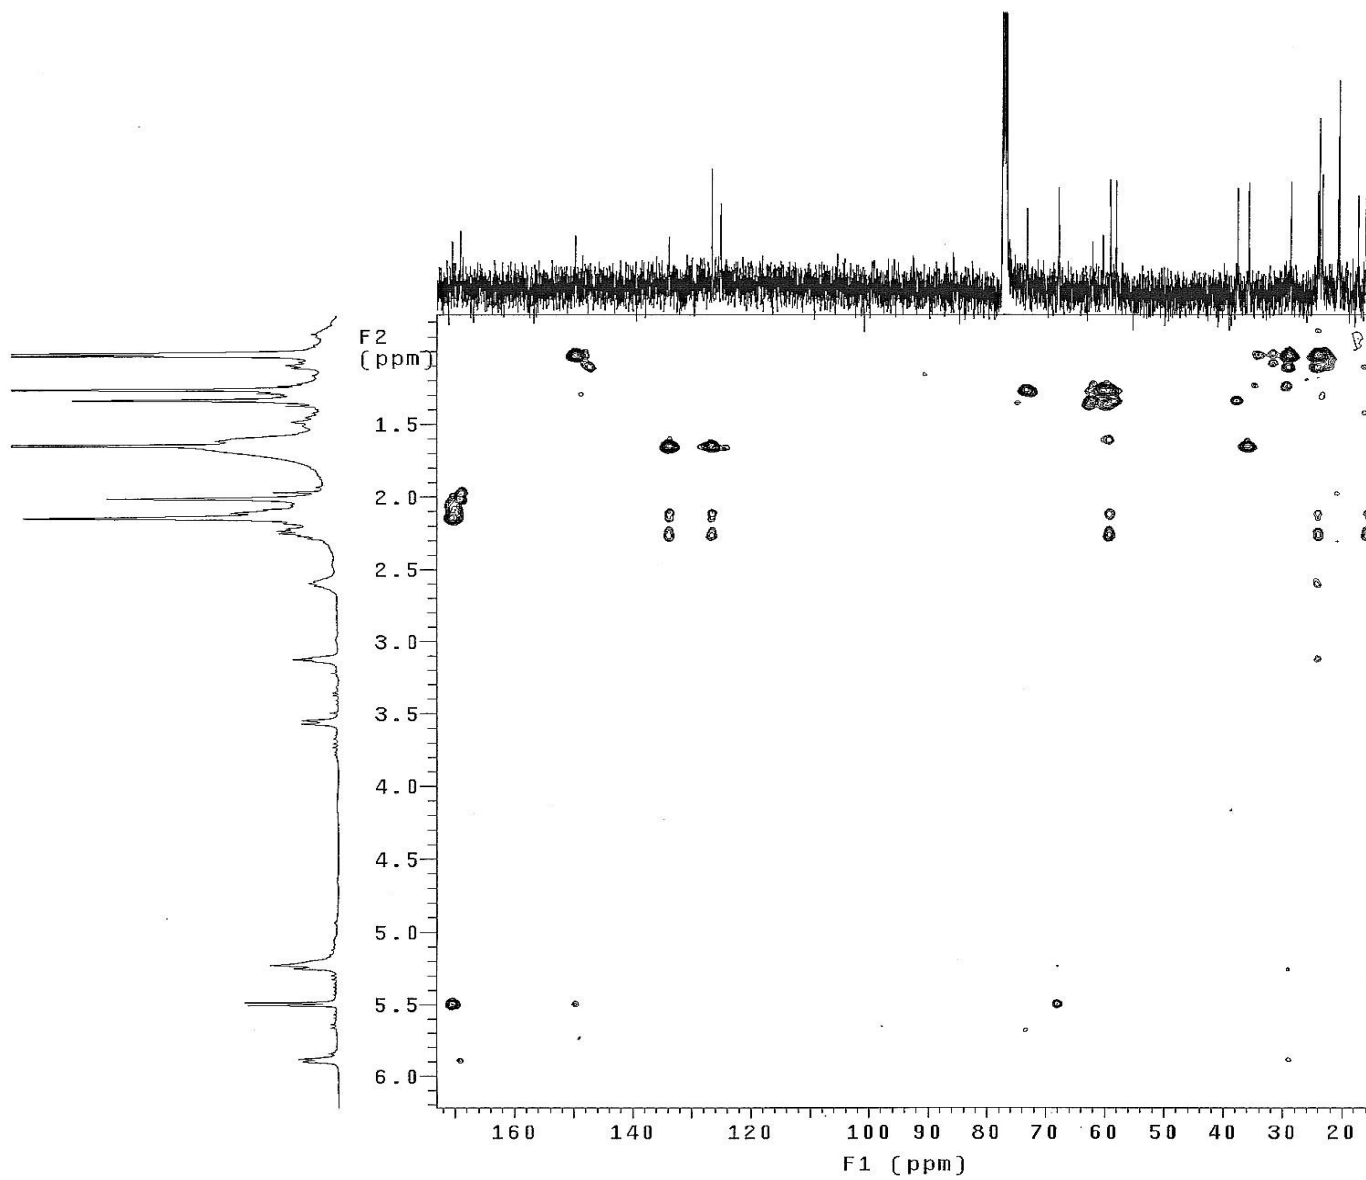

**Figure S20.** HMBC spectrum of **3** in CDCl<sub>3</sub>.

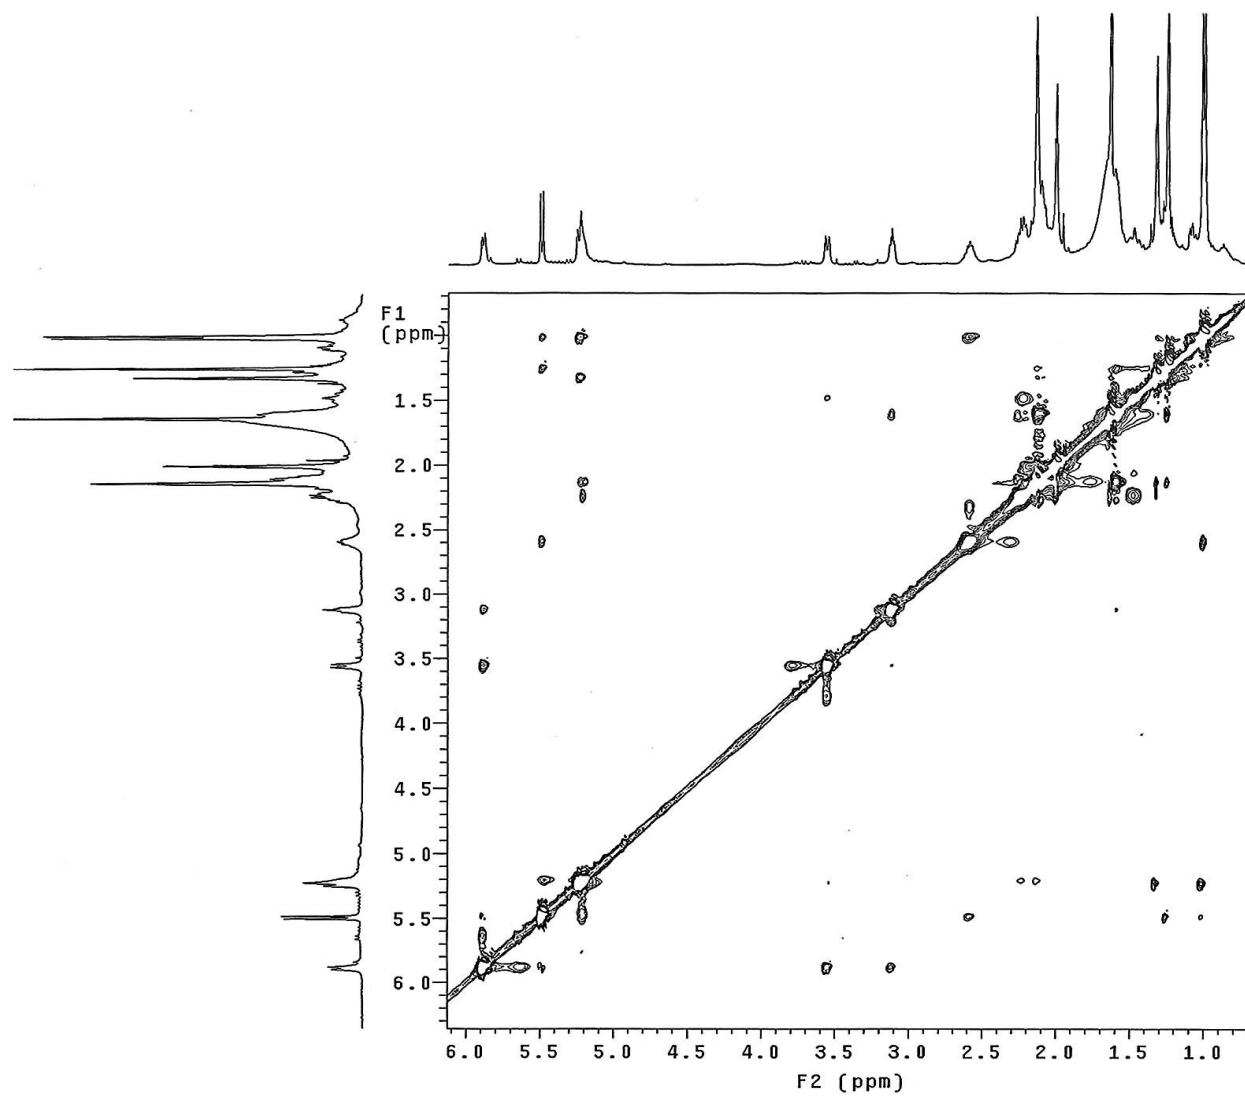

**Figure S21.** NOESY spectrum of **3** in CDCl<sub>3</sub>.

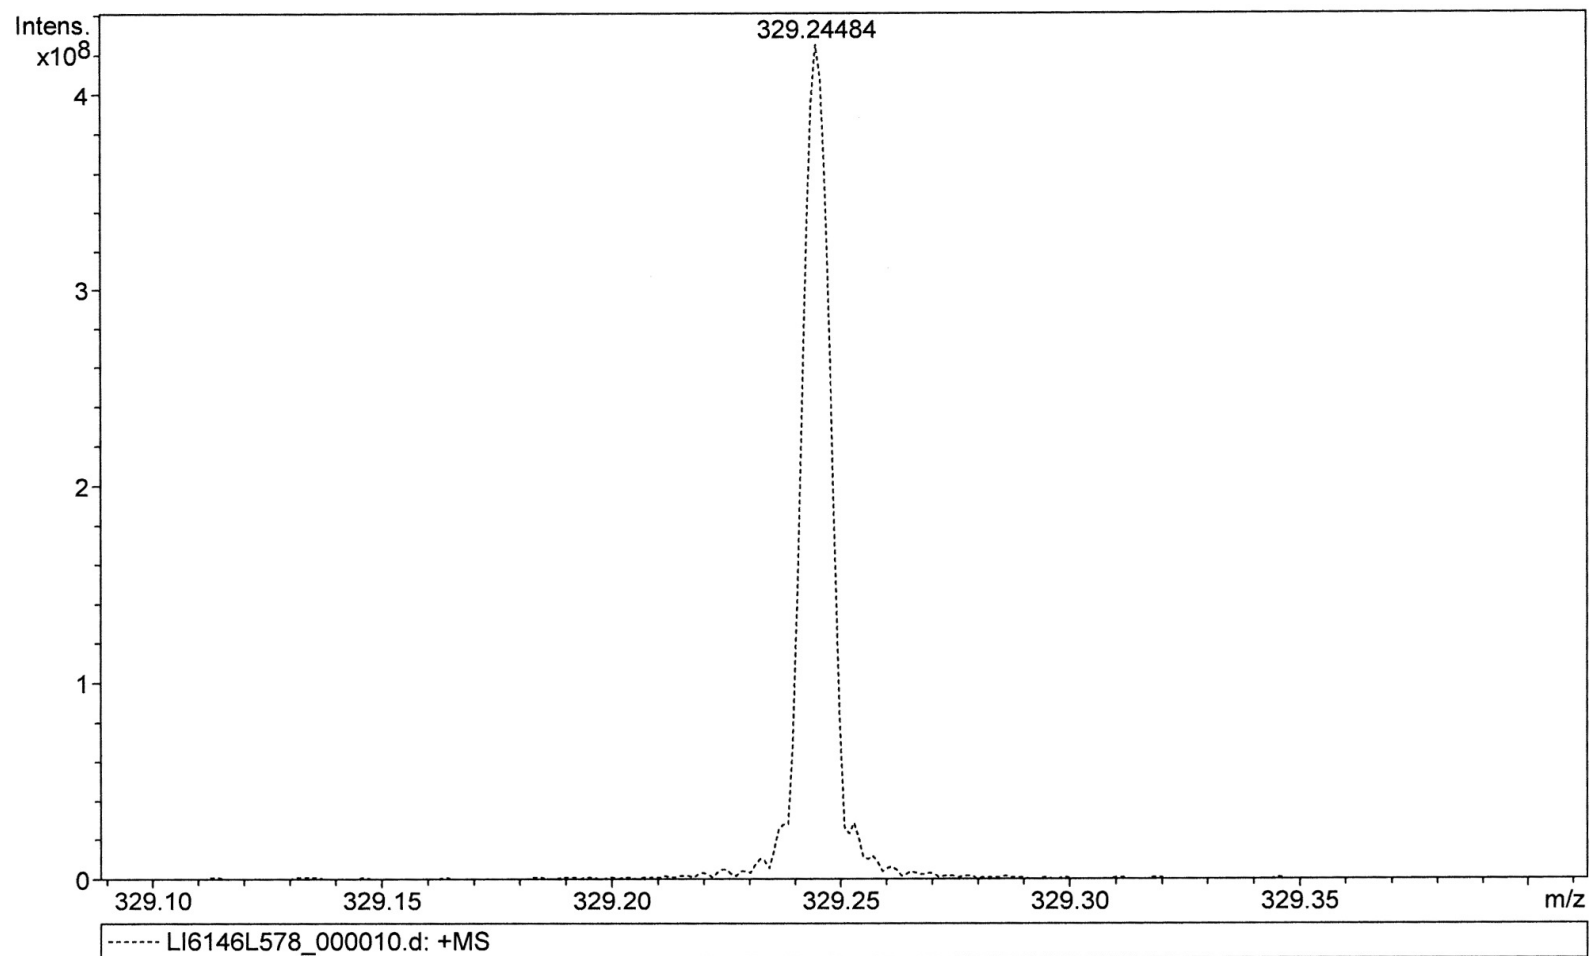

| Meas. m/z | # | Formula                                          | Score  | m/z       | err [mDa] | err [ppm] | mSigma | rdb | e <sup>-</sup> Conf | N-Rule |
|-----------|---|--------------------------------------------------|--------|-----------|-----------|-----------|--------|-----|---------------------|--------|
| 329.24484 | 1 | C <sub>20</sub> H <sub>34</sub> NaO <sub>2</sub> | 100.00 | 329.24510 | 0.27      | 0.81      | 3.6    | 3.5 | even                | ok     |

**Figure S22.** HRESIMS spectrum of **4**.

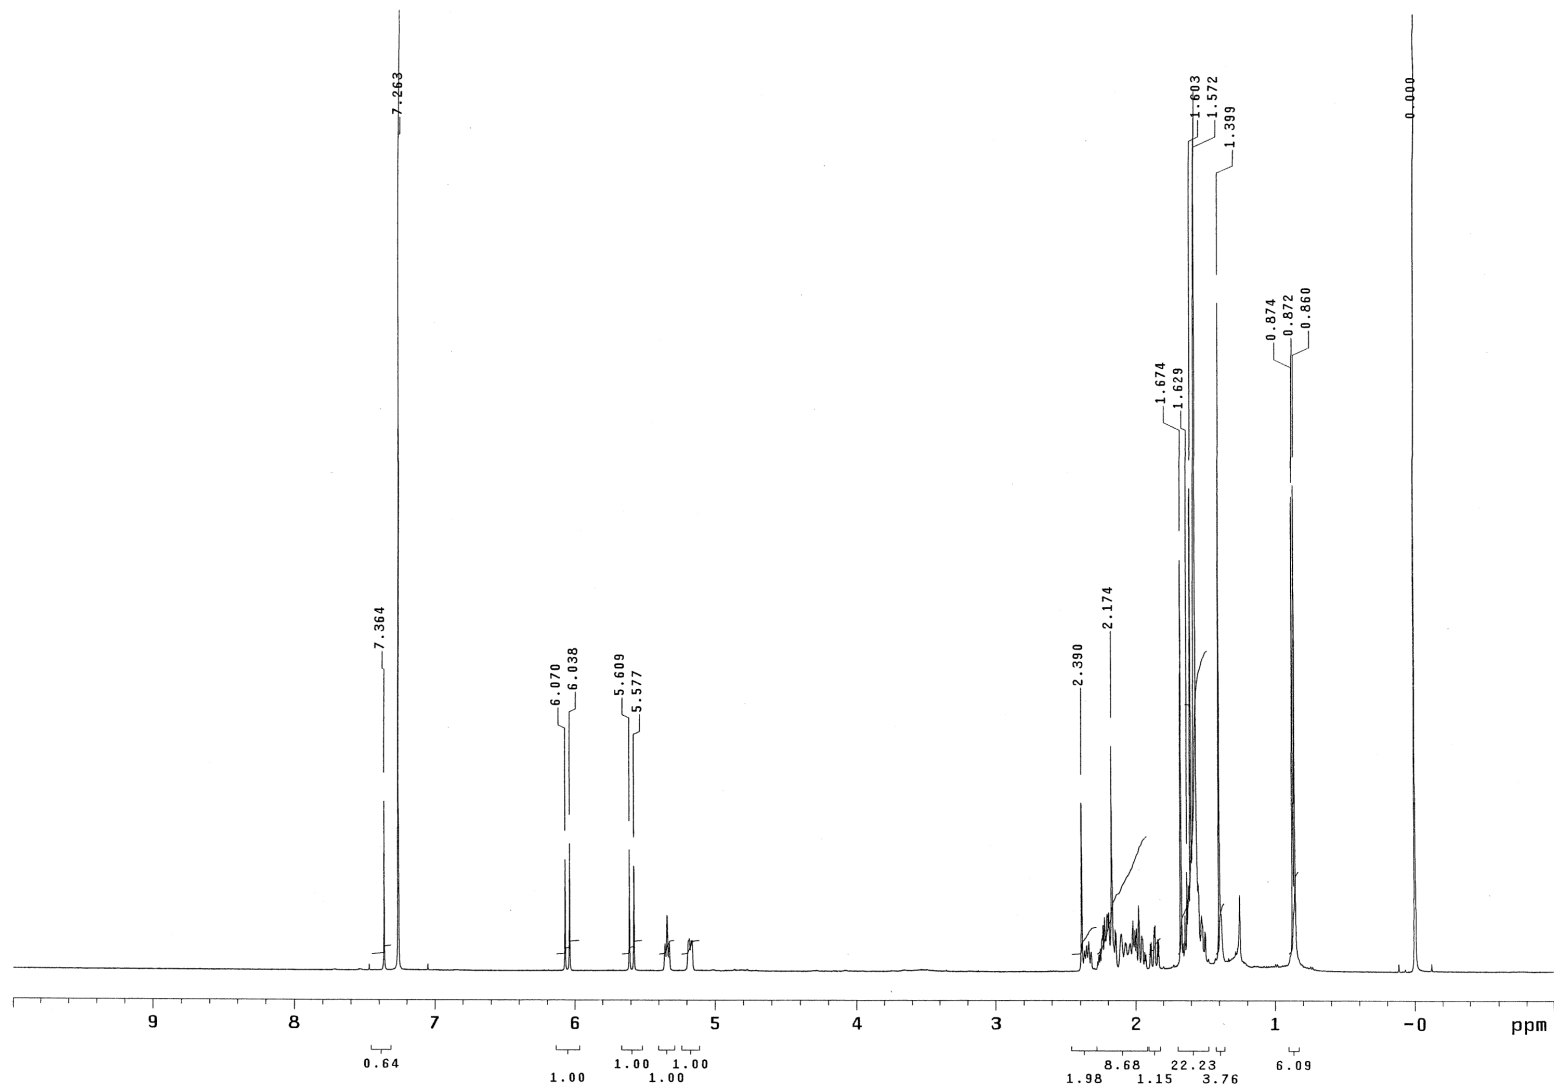

**Figure S23.** <sup>1</sup>H NMR spectrum of **4** in CDCl<sub>3</sub> at 500 MHz.



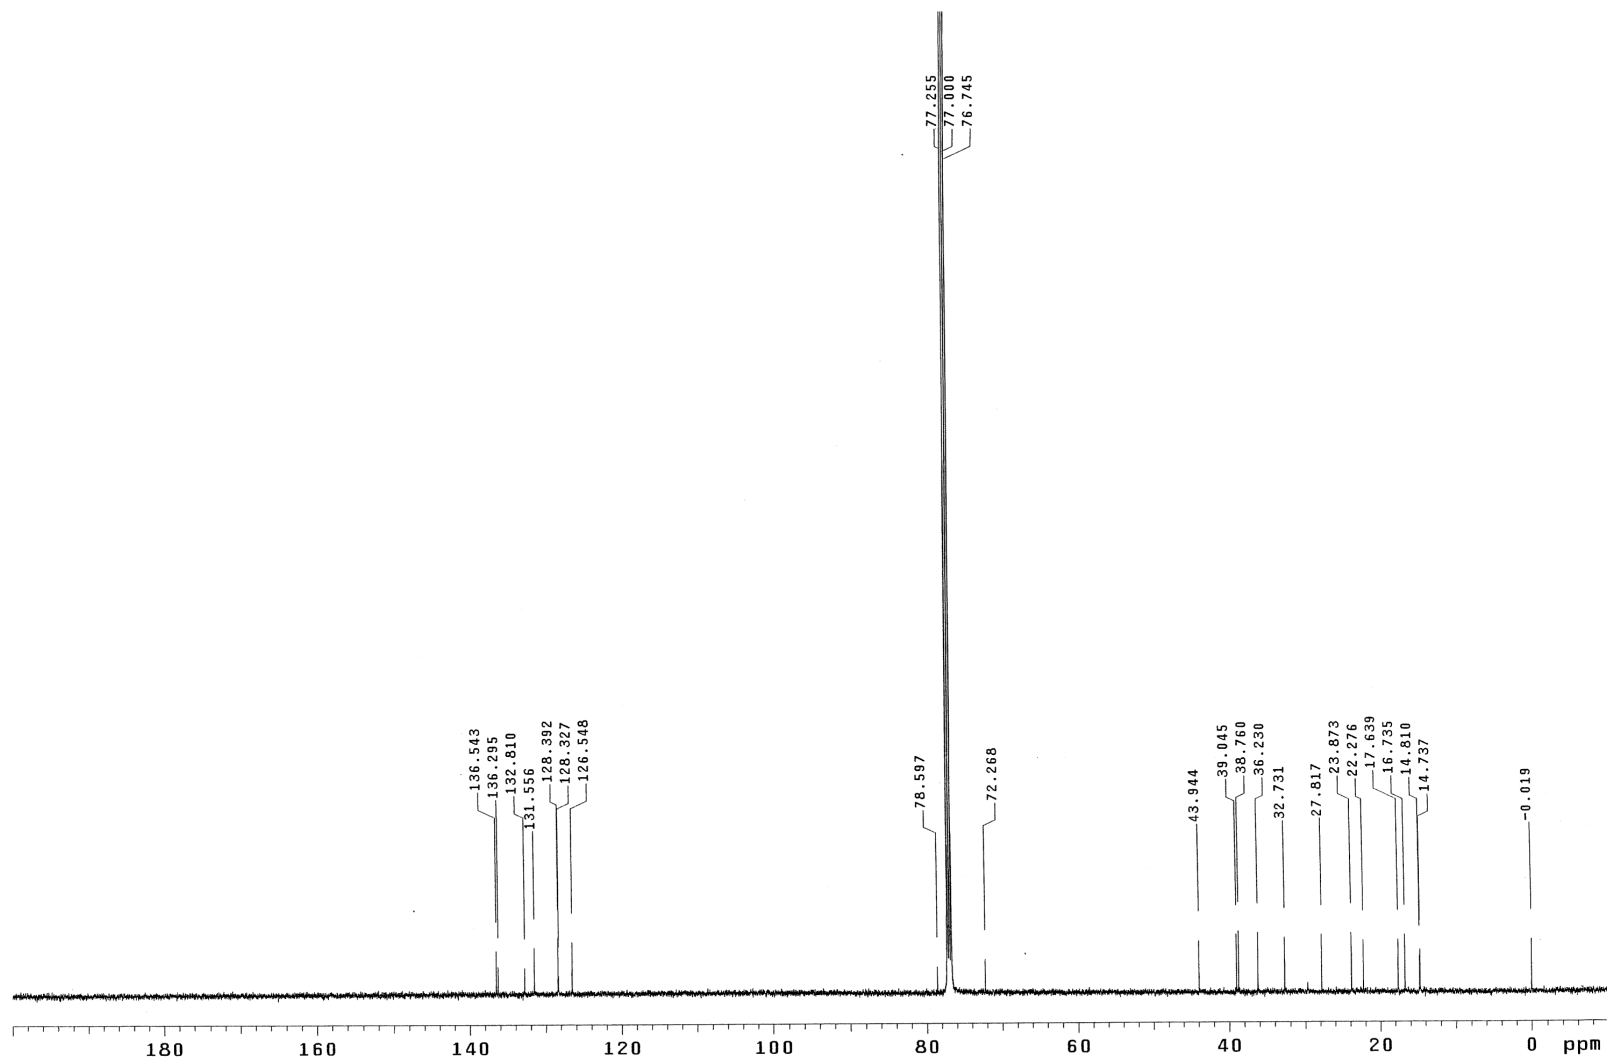

Figure S24.  $^{13}\text{C}$  NMR spectrum of **4** in  $\text{CDCl}_3$  at 125 MHz.

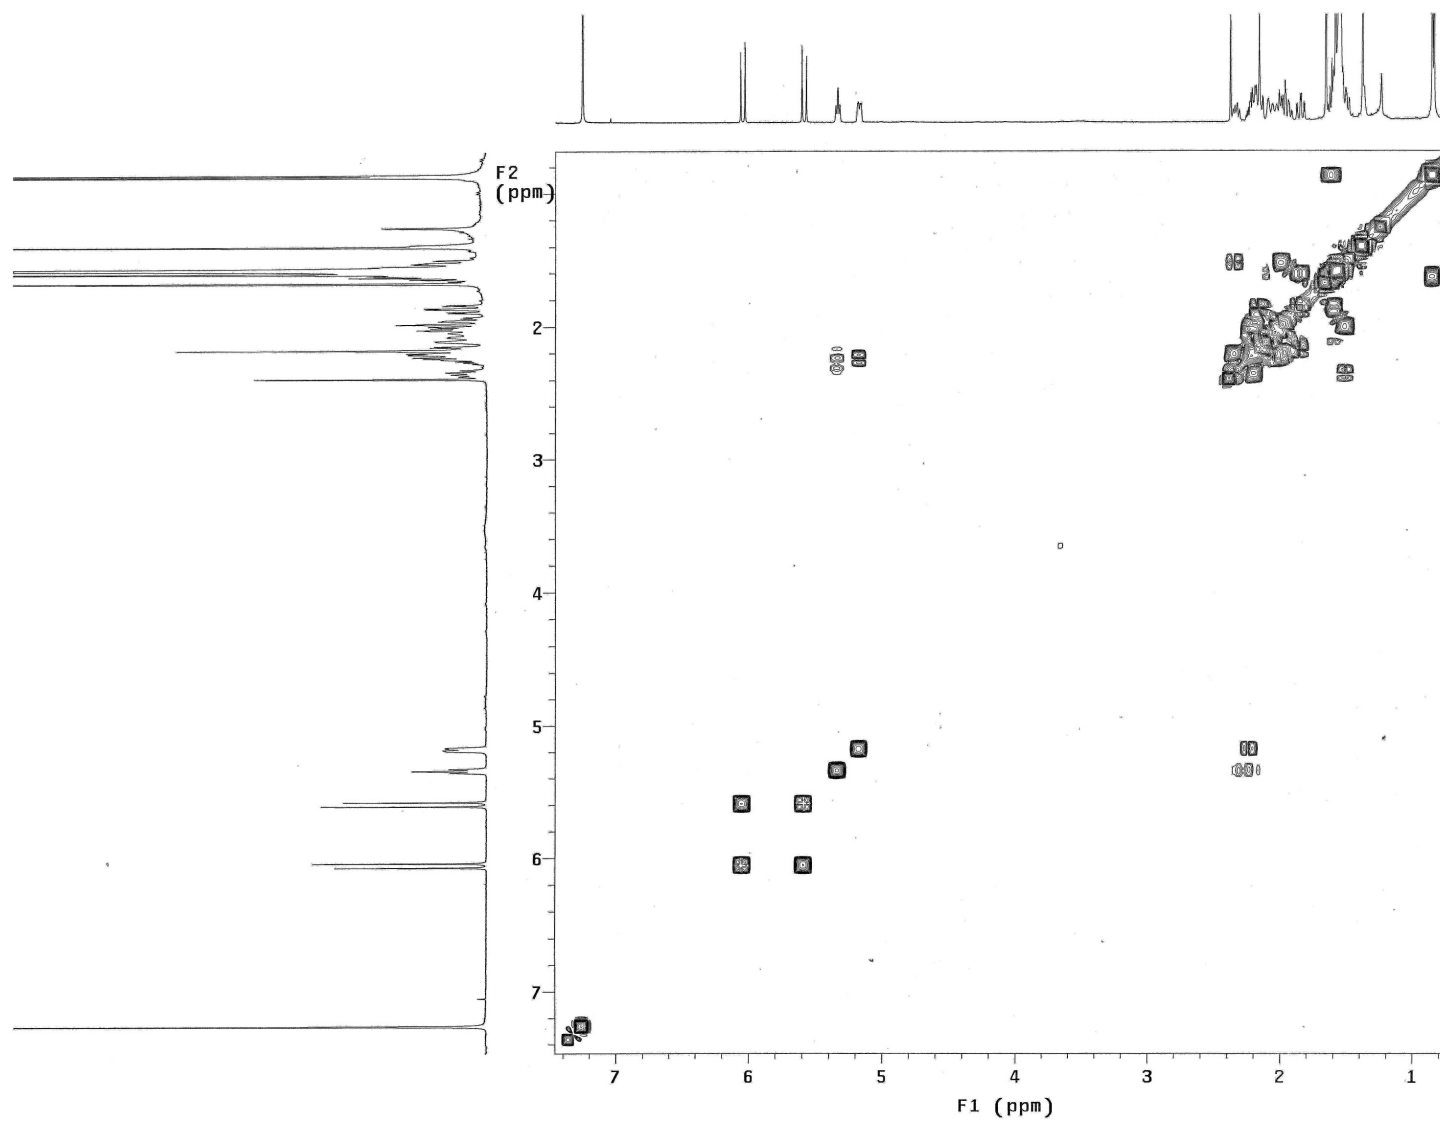

Figure S25.  $^1\text{H}$ - $^1\text{H}$  COSY spectrum of **4** in  $\text{CDCl}_3$ .

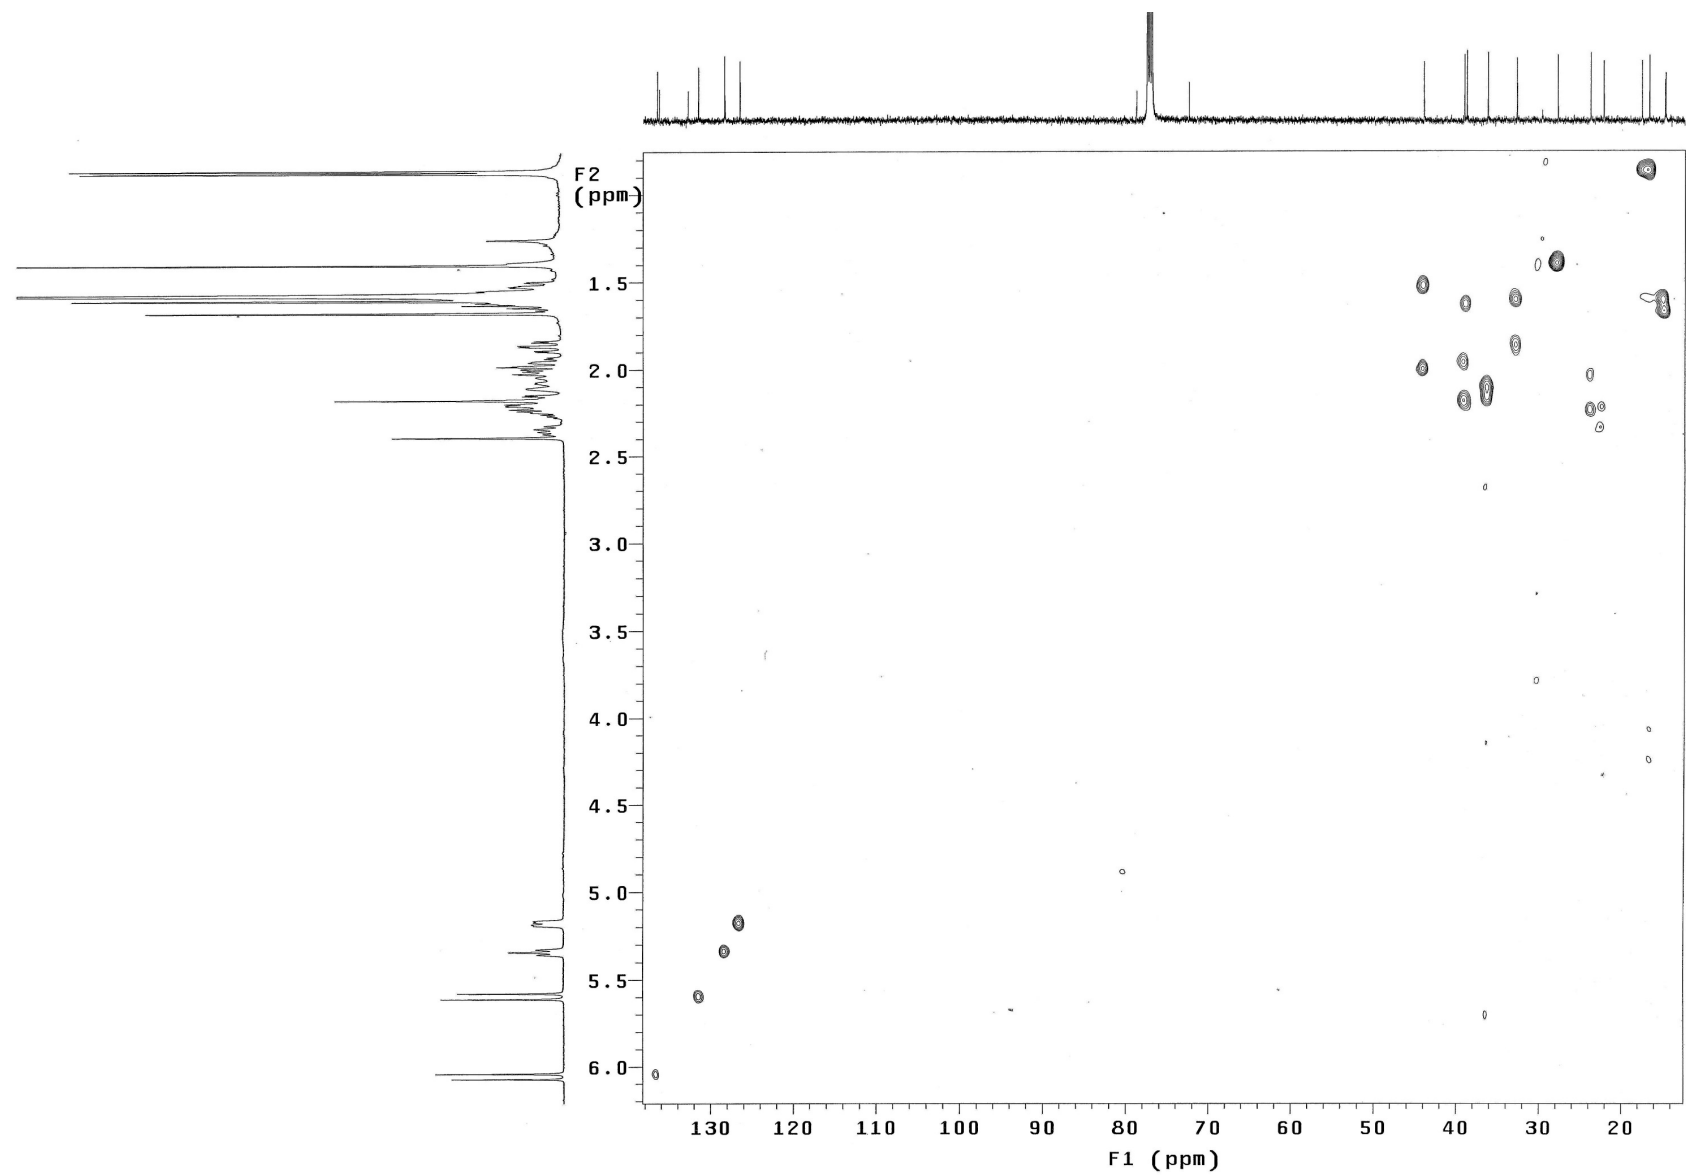

**Figure S26.** HSQC spectrum of **4** in CDCl<sub>3</sub>.

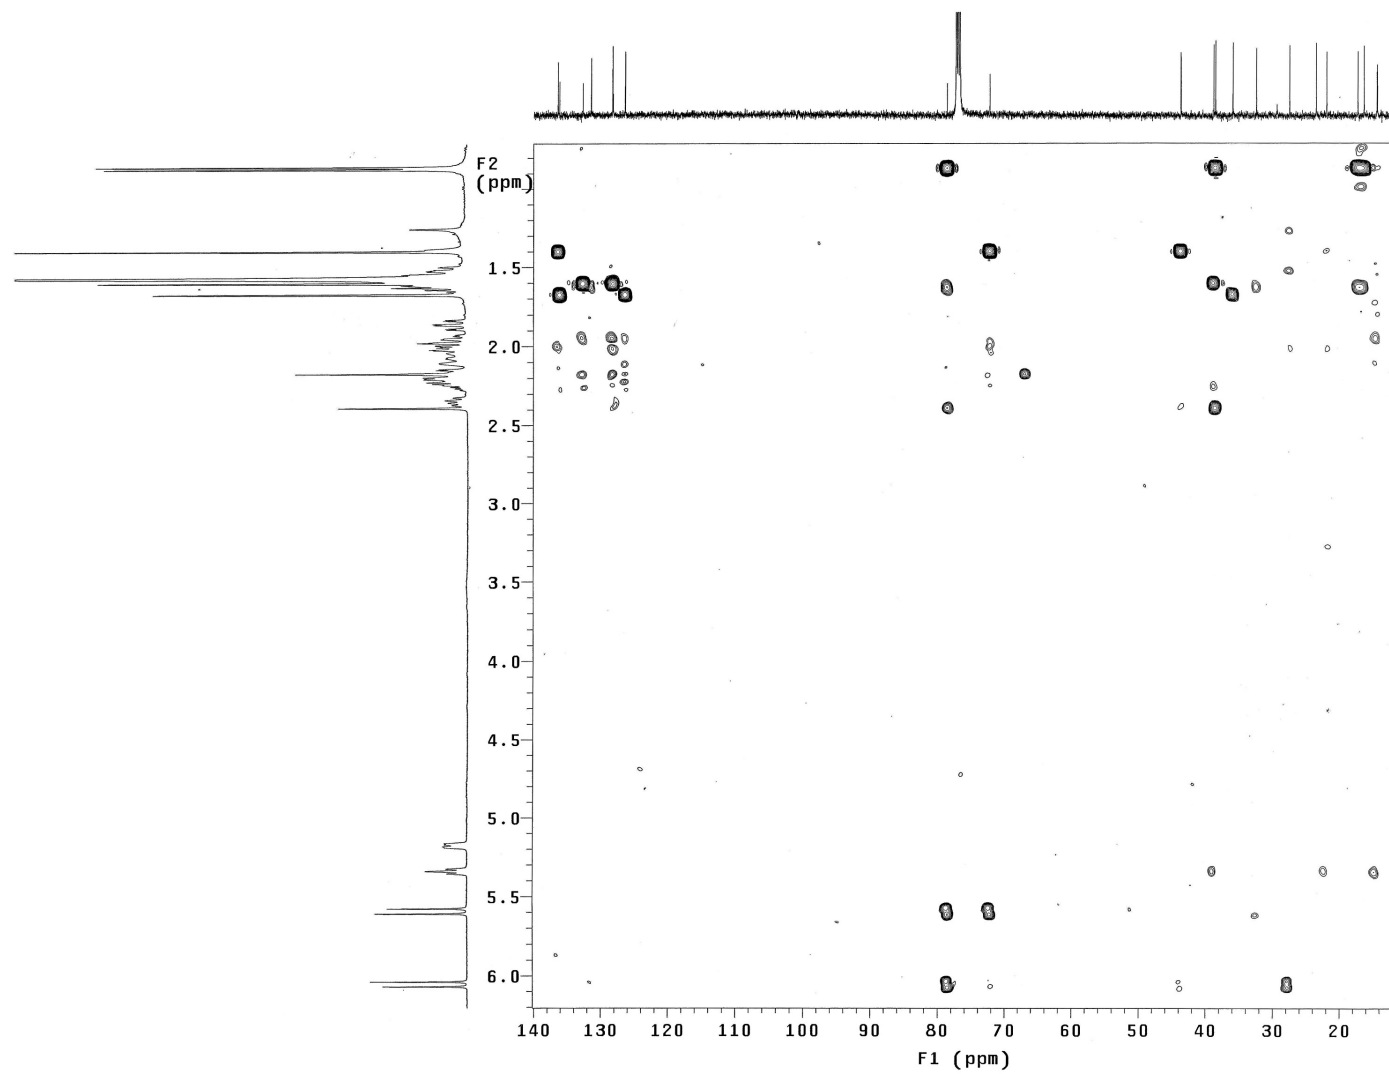

Figure S27. HMBC spectrum of 4 in CDCl<sub>3</sub>.

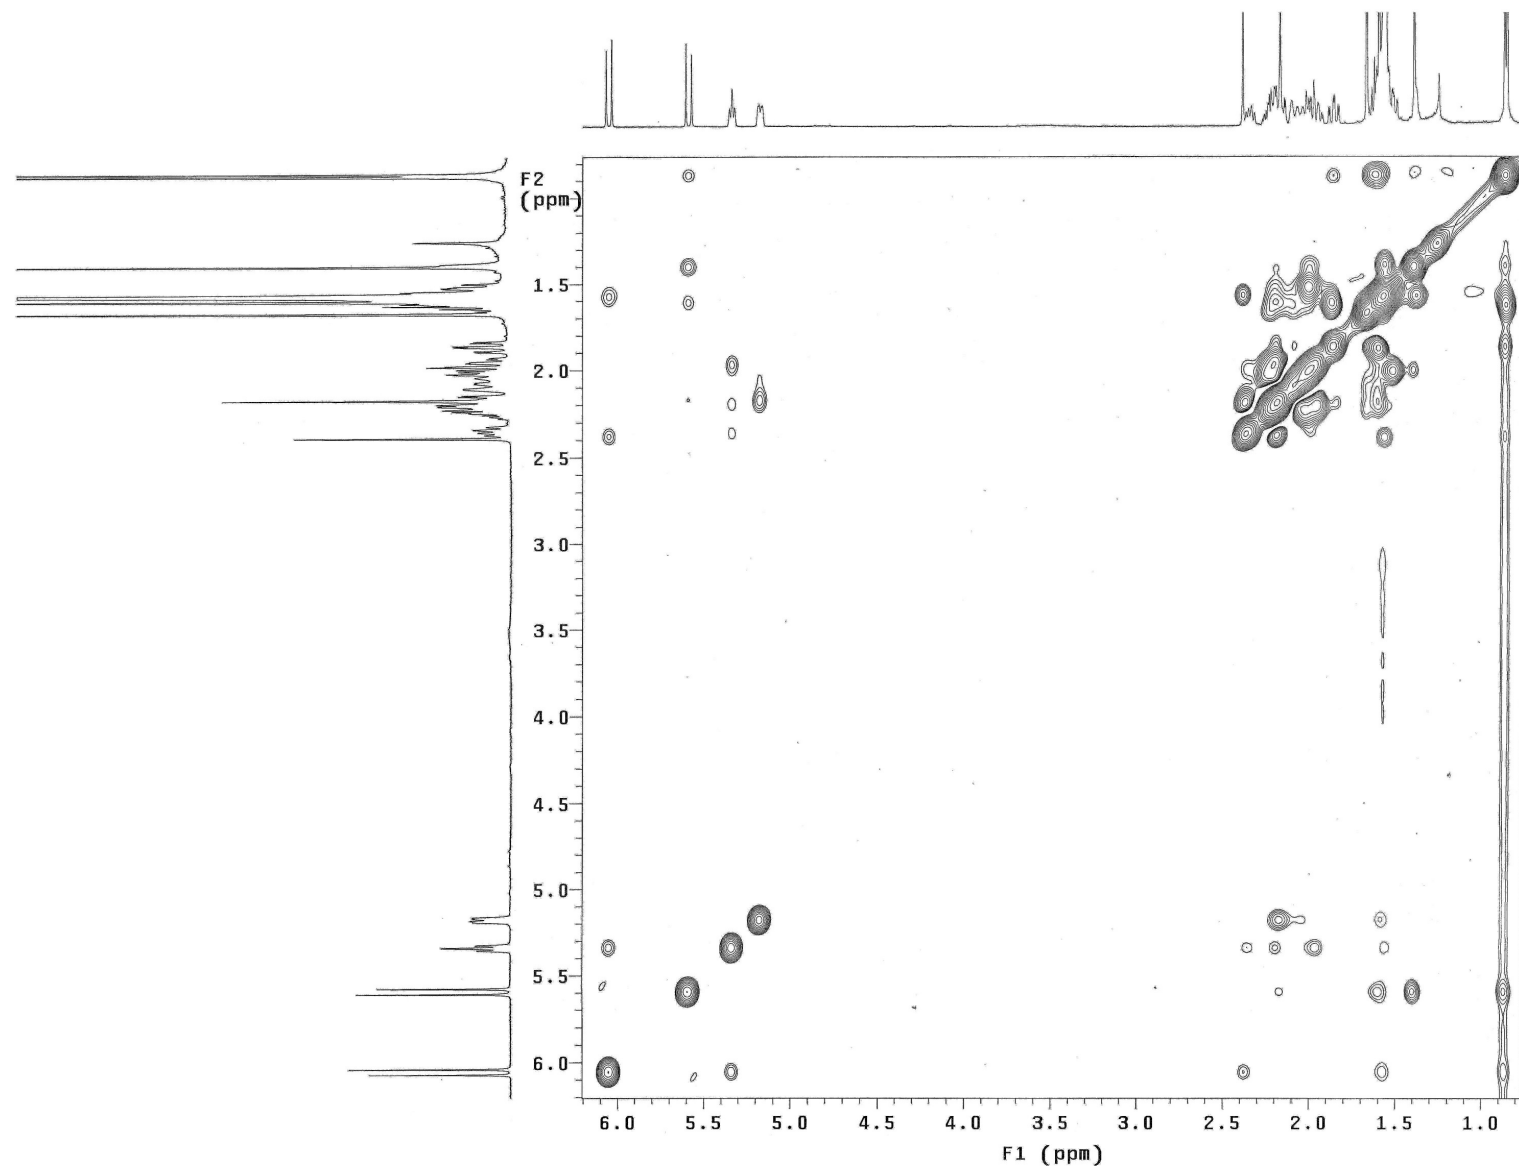

**Figure S28.** NOESY spectrum of **4** in CDCl<sub>3</sub>.
